1 Global Burden of Disease worldwide cohort analysis of  
2 dietary and other risk factors for cardiovascular diseases:  
3 lipid hypothesis versus fat-soluble vitamin hypothesis

4 David K Cundiff (0000-0002-3206-9665), independent researcher,<sup>1,3</sup> Chunyi Wu (0000-0002-  
5 2186-3433), Research Epidemiologist/Statistician,<sup>2,3</sup>

6 1 Long Beach, California, USA

7 2 Area Specialist Lead in Epidemiology and Statistics, Michigan Medicine, Ann Arbor,  
8 Michigan, USA

9 3 Volunteer collaborators with the Institute of Health Metrics and Evaluation, Seattle,  
10 Washington, USA

11 Correspondence to David K Cundiff [davidkcundiff@gmail.com](mailto:davidkcundiff@gmail.com) Phone: 01-562-438-8805

12 Word count: abstract 366, Text: 3985

13

14

15 **Abstract**

16 **Objective** Using Global Burden of Disease (GBD) worldwide data to compare the “lipid  
17 hypothesis” of Ancel Keys, MD with the “fat-soluble hypothesis” that we introduce here.

18 **Design**

19 With GBD 2017 data from the Institute of Health Metrics and Evaluation (IHME) on  
20 cardiovascular disease deaths/100k/year, ages 15-69 years old in male and female cohorts (CVD)  
21 and dietary and other risk factors, we formatted and population weighted data from 195  
22 countries. We correlated CVD with dietary and other risk factors worldwide and in appropriate  
23 subsets.

24 **Setting**

25 Post hoc ecological cohort study

26 **Participants**

27 Each of the 7846 rows of data (cohorts) represented about 1 million people, projected to  
28 represent about 7.8 billion people in 2020.

29 **Interventions** Define a “fat-soluble vitamin variable” (FSVV) as the sum of kilocalories/day  
30 (KC/d) of processed meat + red meat + fish + milk + poultry + eggs + (saturated fatty acids  
31 (SFA) + polyunsaturated fatty acids (PUFA) + trans fatty acids (TFA)) \* 0.46. Perform  
32 Pearson correlations on the formatted worldwide dataset and on relevant subsets.

33 **Main outcome measures**

34 The correlations of 43 dietary and other potential CVD risk factors and FSVV with CVD  
35 worldwide and in relevant subsets

36

37

38 **Results**

39 Low density lipoprotein cholesterol (LDL-c) correlated strongly positively with FSVV  
40 worldwide ( $r=0.780$ , 95% CI 0.771 to 0.788,  $p<0001$ ,  $n=7846$  cohorts), so we considered FSVV  
41 our marker variable to test the lipid hypothesis as well as our fat-soluble vitamin hypothesis. The  
42 FSVV correlated negatively with CVD worldwide ( $r= -0.329$ , 95% CI -0.349 to -0.309,  
43  $p<0.0001$ ), and FSVV correlated positively with CVD in high FSVV cohorts (when  
44  $FSVV\geq 567.3$  KC/d:  $r=0.523$ , 95% CI 0.476 to 0.567,  $p<0001$ ,  $n=974$  cohorts, compared with  
45 worldwide mean  $FSVV=285.4$  KC/d,  $n=7846$  cohorts).

46 **Conclusion**

47 Since FSVV correlated positively with CVD only in high FSVV cohorts ( $FSVV\geq 567.3$  KC/d,  
48  $n=974$  cohorts), the lipid hypothesis is supported only in GBD cohorts (and by inference  
49 individuals) with high FSVV intake. These data support the fat-soluble vitamins hypothesis  
50 because FSVV correlated negatively with CVD worldwide, meaning the more fat-soluble  
51 vitamin containing animal foods and fat for gut absorption the less the CVD. This GBD cohort  
52 data analysis methodology could supplement prospective observational studies of individuals to  
53 be used in developing food policy and education strategies for improving public health.

54

55

## 56 **Introduction**

57 The scientific validity of the Dietary Guidelines for Americans for 2015-2020, including  
58 guidelines based on the lipid hypothesis, was challenged by Journalist Nina Teicholz in the *BMJ*.  
59 The Center for Science in the Public Interest called for the *BMJ* to retract the article. The peer  
60 reviewers the *BMJ* selected to adjudicate the far-reaching dispute concluded that, “Teicholz’s  
61 criticisms of the methods used by Dietary Guidelines for Americans Committee are within the  
62 realm of scientific debate.”

63  
64 We define our fat-soluble vitamin hypothesis as, “suboptimal dietary intake of fat-  
65 soluble vitamins and added fat for gut absorption increases cardiovascular disease  
66 risk.” Fat-soluble vitamins include vitamins A, D, E, and K (K1=phylloquinones and K2=  
67 menaquinones). Vitamin A and its beta-carotene precursor are important in preventing congenital  
68 heart disease.[1, 2] Vitamin E protects the vasculature against oxidative stress, including lipid  
69 peroxidation and the production of atherogenic forms of LDLc—a part of the pathogenesis of  
70 cardiovascular disease.[3] Vitamin K2 (menaquinones from animal foods and fermented plant  
71 products) inhibits arterial calcification, a major factor in the pathogenesis of atherosclerosis and  
72 cardiovascular disease.[4] Regarding vitamin D, a meta-analysis showed an inverse  
73 association between cardiovascular disease and circulating 25(OH)-vitamin D  
74 ranging from 20 to 60 nmol/L.[5]

75  
76 The four fat-soluble vitamins come primarily from animal foods. Vitamin K2 levels  
77 are high in aged cheeses, other fermented dairy products,[6] organ meats (e.g.,  
78 bovine and pork liver), chicken, and egg yolks.[7] The highest vitamin K2 levels per

79 100g serving are in fermented legumes, particularly soy (e.g., natto and miso (Japan),[8,  
80 9] soybean Douchi, soybean Meitauza, and soybean curd (China and Taiwan),[10] and  
81 Cheonggukjang, a fermented soybean stew (South Korea)).[11]

82

83 This paper will use population weighted, formatted, worldwide GBD 2017 data from the IHME  
84 to assess the impact of dietary, metabolic, and other risk factors on cardiovascular disease early  
85 deaths.

86

## 87 **Methods**

### 88 **Data sources**

89 As volunteer collaborators with the IHME, we acquired and utilised raw GBD worldwide  
90 ecological data (GBD 2017: 195 countries and 365 subnational locations, n=1120 male and  
91 female cohorts). Data consisted of the rate of cardiovascular disease early deaths, metabolic risk  
92 factors, dietary risk factors and covariates, and other risk factors of male and female cohorts 15-  
93 49 years old and 50-69 years old from each year 1990-2017. GBD worldwide citations of over  
94 12,000 surveys constituting ecological data inputs for this analysis are available online from  
95 IHME.[12] The main characteristics of IHME GBD data sources, the protocol for the GBD  
96 study, and all risk factor values have been published by IHME GBD data researchers and  
97 discussed elsewhere.[13-16] These include detailed descriptions of categories of input data,  
98 potentially important biases, and the methodologies of analysis. We did not clean or pre-process  
99 any of the GBD data. GBD cohort risk factor and health outcome data from the IHME had no  
100 missing records. Food risk factors came from IHME as gram/day (g/d) consumed per capita.  
101 GBD dietary covariate data originally came from Food and Agriculture Organization surveys of  
102 animal and plant food commodities available per capita in countries worldwide (potatoes, corn,  
103 rice, sweet potatoes, poultry, and eggs)—as opposed to consumed per capita.[12] Supplementary  
104 Table 1 lists the relevant GBD risk factors, covariates, and other available variables with  
105 definitions of those risk factor exposures.[17] Once IHME staff time constraints due to COVID-  
106 19 data collection and modeling are over, the updated GBD 2019 data with all the variables as  
107 the GBD 2017 data we used for this analysis may be obtained by volunteer researchers  
108 collaborating with IHME.[18]

109

110  
111  
112  
113  
114  
115  
116  
117  
118  
119  
120  
121  
122  
123  
124  
125  
126  
127  
128  
129  
130  
131  
132

## Study design and population

For cardiovascular disease early deaths and all risk factors, we averaged the values for ages 15-49 years old together with 50-69 years old for each male and female cohort for each year.

Finally, for each male and female cohort, data from all 28 years (1990-2017) of the means of the rate of cardiovascular disease early deaths and risk factor exposures were averaged using the computer software program R. We defined the rate of cardiovascular disease early deaths as “deaths/100k/year of males and females 15-69 years old”: abbreviated “CVD.”

To weigh the data according to population, internet searches (mostly Wikipedia) yielded the most recent population estimates for countries and subnational states, provinces, and regions. The 1120 GBD cohorts available were population weighted by a software program in R resulting in an analysis dataset with 7846 population weighted cohorts representing about 7.8 billion people in 2020. Each male or female cohort in the population-weighted analysis dataset represented approximately 1 million people (range: < 100,000 to 1.5 million). For example, India with about 1.234 billion people had 617 rows of the same data for males and 617 rows for females. Maldives, with about 445,000 people, had a single row of data for males and another for females. Without population-weighting the data, cohorts in India and Maldives each would have had one row for males and one row for females in the analysis dataset, invalidating the analysis results. World population data from the World Bank or the Organisation for Economic Co-operation and Development could not be used because they did not include all 195 countries or any subnational data.

133 Supplementary Table 2 details how omega-3 fatty acid g/d was converted to fish g/d using data  
134 on the omega-3 fatty acid content of frequently eaten fish from the National Institutes of Health  
135 Office of Dietary Supplements (USA).<sup>[19]</sup> As shown in Supplementary Table 3, we converted all  
136 of the animal and plant food data, including alcohol and sugary beverage consumption, from g/d  
137 to kilocalories/day (KC/d). For the g/d to KC/d conversions, we used the Nutritionix track  
138 app,[20] which tracks types and quantities of foods consumed. Saturated fatty acids (SFA: 0-1  
139 portion of the entire diet) was not available with GBD 2017 data, so GBD saturated fatty acids  
140 risk factor data from GBD 2016 was used. Polyunsaturated fatty acid (PUFA) and trans fatty acid  
141 (TFA) GBD risk factor data from 2017 (0-1 portion of the entire diet) were also utilised, but  
142 monounsaturated fat data were not available. These fatty acid data expressed as 0-1 portion of  
143 the entire diet were converted to KC/d by multiplying by the total KC/d available per capita for  
144 each cohort.

145

## 146 Outcome and covariates

147 The principal outcome variable, CVD, was a combination variable consisting of the  
148 deaths/100k/year from ischemic heart disease, stroke, hypertensive heart disease, rheumatic heart  
149 disease, non-rheumatic valvular disease, subarachnoid haematoma, myocarditis, alcoholic  
150 cardiomyopathy, endocarditis, aortic aneurysm, and atrial fibrillation. Given the multiple dietary  
151 and other influences on the causation of CVD, we did not attempt to differentiate between risk  
152 factors and covariates.

153

154

155



156 Statistical methods

157 To test the fat-soluble vitamin hypothesis, we summed the KC/d of processed meat, red meat,  
158 fish, milk (including all dairy products), poultry, eggs, and added fat (SFA, PUFA, and TFA) to  
159 create a fat-soluble vitamins variable (FSVV). In determining the portion of SFA, PUFA, and  
160 TFA added in addition to the SFA, PUFA, and TFA in the animal and plant foods, an adjustment  
161 factor (fatty acids \* 0.46), adapted from the website “Our World in Data,” differentiated the fatty  
162 acids in individual foods from the added fatty acids (46% of the total).[21] This adjustment  
163 prevented double counting fatty acids KC/d and allowed a reasonably accurate determination of  
164 FSVV KC/d.

165

166 To determine the strengths of the risk factor correlations with CVD of population weighted  
167 worldwide cohorts (n=7846 cohorts) or subgroups of cohorts (e.g., highest and lowest CVD  
168 cohorts, etc.), we utilised Pearson correlation coefficients: r, 95% confidence intervals (CIs), and  
169 p values. A subgroup of the cohorts with the lowest CVD values was determined as 500 pair of  
170 male and female cohorts (mean CVD values) totaling 1000 total cohorts (an arbitrary number).  
171 Using the FSVV median value in that low CVD subgroup, we formed a subgroup with FSVV  
172 greater than or equal to the median FSVV. This allowed us to test the lipid hypothesis in cohorts  
173 with the highest intakes of animal foods and added fats.

174

175 To identify confounding in the univariate correlations, we used partial correlations, holding  
176 constant the suspected confounder variables.

177

178 We used SAS and SAS OnDemand for Academics software 9.4 (SAS Institute, Cary, NC) for the  
179 data analysis.

180

### 181 Sensitivity analyses

182 We performed subset analyses on the 1000 cohorts with the lowest levels of CVD and on cohorts  
183 with FSVV levels greater than or equal to the median FSVV KC/d value of the 1000 cohorts  
184 with the lowest levels of CVD.

185

### 186 Patient and public involvement

187 This was a post hoc statistical analysis of IHME GBD 2017 data. No data or observations on  
188 patient and public involvement were available from IHME or the over 12,000 surveys[12] from  
189 which the raw GBD data were derived.

190

## 191 **Results**

### 192 Patient characteristics

193 Table 1 shows the 43 dietary, metabolic, and other risk factors potentially contributing to CVD.  
194 See Supplementary Table 1 for definitions of the risk factor and co-variate variables. LDLc  
195 negatively correlated with CVD worldwide ( $r=-0.279$ , 95% CI -0.299 to -0.258,  $p<0001$ , Table  
196 1), meaning the higher the LDLc mmol/L the lower the CVD. Figure 1 gives the worldwide plot  
197 of LDLc versus CVD, showing widely scattered data points with negative slope.

198  
199 The FSVV negatively correlated with CVD worldwide ( $r=-0.329$ , 95% CI -0.349 to -0.309,  
200  $p<0001$ , Table 1), meaning more FSVV KC/d (processed meats KC/d + red meats KC/d + fish  
201 and seafood KC/d + milk KC/d + poultry KC/d + eggs KC/d + added fatty acids) associated with  
202 reduced CVD.

203  
204 Table 1 also shows that six of the nine plant foods negatively correlated with CVD. Potatoes  
205 (KC/d available, a covariate derived from total potato KC available/population, including highly  
206 processed potatoes) positively correlated with CVD ( $r=0.050$ , 95% CI 0.028 to 0.073,  $p<0001$ ).  
207 Sugary beverages also correlated positively with CVD ( $r=0.113$ , 95% CI 0.091 to 0.135,  
208  $p<0001$ ). Rice and legumes were not significantly correlated with CVD.

### 210 Subset analyses

211 Table 2 includes 500 male and female pairs of cohorts (total=1000 cohorts, an arbitrary number,  
212 representing approximately 1 billion people out of about 7.8 billion people worldwide) with the  
213 lowest CVD values ( $CVD \leq 293.0$  compared with mean  $CVD=543.7$  worldwide).

214

215 Table 3 shows FSVV related risk factors (processed meat, red meat, fish, milk, poultry, eggs, and  
216 added (SFA+PUFA+TFA)) for the 34 countries in Table 2 in descending order by CVD.

217

218 Table 4 gives all the CVD risk factors for seven representative countries out of the 34 countries  
219 in Tables 2 and 3 ( $CVD \leq 293.0$ ).

220

221 Table 5 shows CVD and risk factor statistics for cohorts with  $FSVV \geq 567.3$  KC/d (i.e., at or  
222 above the median FSVV of Table 2 countries). In this subset of 974 cohorts, of which 500 were  
223 included in the low CVD subset (Table 2), FSVV strongly positively correlated with CVD  
224 ( $r=0.523$ , 95% CI 0.476 to 0.567,  $p<0001$ ).

225

226 Although FSVV correlated strongly with LDLc worldwide ( $r=0.780$ , 95% CI 0.771 to 0.788,  
227  $p<0001$ ,  $n=7846$  cohorts, Table 1), FSVV negatively correlated with LDLc in cohorts with  
228  $FSVV \geq 567.3$  KC/d ( $r=-0.571$ , 95% CI -0.612 to -0.528,  $p<0001$ ,  $n=974$  cohorts). Also with  
229  $FSVV \geq 567.3$  KC/d, LDLc and CVD negatively correlated ( $r=-0.254$ , 95% CI -0.312 to -0.194,  
230  $p<0001$ ,  $n=974$  cohorts). Because of the inconsistency of the FSVV versus LDLc relationship  
231 with very high FSVV KC/d levels, we considered LDLc confounded at high FSVV levels. We  
232 therefore used FSVV, rather than LDLc, to test for the lipid hypothesis in high FSVV cohorts.

233

234 The average alcohol intake was 81.0 KC/d worldwide, and alcohol KC/d correlated negatively  
235 with CVD ( $r=-0.061$ , 95% CI -0.083 to -0.039,  $p<0001$ , Table 1). However, in high FSVV  
236 cohorts ( $FSVV \geq 567.3$  KC/d, mean  $FSVV=692.6$  KC/d and mean alcohol=155.0 KC/d), alcohol

237 positively correlated with CVD ( $r=0.475$ , 95% CI 0.425 to 0.522,  $p<0001$ ,  $n=974$  cohorts, Table  
238 5).

239

240 The only fat-soluble vitamin in the GBD database, vitamin A deficiency incidence/100k in  
241 children  $\leq 5$  years old, correlated positively with CVD worldwide ( $r=0.210$ , 95% CI 0.189 to  
242 0.231,  $p<0001$ , Table 1).

243

244 Dietary fiber was not significantly correlated with CVD worldwide ( $r=0.019$ , 95% CI -0.003 to  
245 0.041,  $p=0.09$ , Table 1). Once it was adjusted for FSVV, alcohol, sugary beverages, and potatoes  
246 by partial correlation analysis; dietary fiber correlated negatively with CVD ( $r=-0.052$ , 95% CI -  
247 0.074 to -0.030,  $p<0.0001$ ).

248

249 Physical activity positively correlated with CVD worldwide ( $r=0.160$ , 95% CI 0.139 to 0.182,  
250  $p<0.0001$ , Table 1). Once it was adjusted for FSVV, smoking, and sex by partial correlation  
251 analysis; physical activity correlated negatively with CVD ( $r=-0.127$ , 95% CI -0.149 to -0.104,  
252  $p<0.0001$ ).

253

254 In cohorts, mostly in developed countries, with FSVV  $\geq 567.3$  KC/d discontinuing breast feeding  
255 correlated positively with CVD ( $r=0.268$ , 95% CI 0.208 to 0.325,  $p<0.0001$ , Table 5).

256

257 Secondhand smoking negatively correlated with CVD worldwide ( $r=-0.225$ , 95% CI -0.246 to -  
258 0.204,  $p<0.0001$ , Table 1). After adjusting secondhand smoking for smoking, sublingual tobacco

259 use, household smoke, ambient air pollution, and sex by partial correlation analysis; secondhand  
260 smoke correlated positively with CVD ( $r=0.048$ , 95% CI 0.025 to 0.070,  $p<0.0001$ ).

261  
262 The metabolic risk factors, BMI, FPG, and LDLc, all correlated negatively with CVD worldwide  
263 ( $r=-0.240$ , 95% CI -0.261 to -0.219,  $p<0.0001$ ,  $r=-0.178$ , 95% CI -0.200 to -0.157,  $p<0.0001$ , and  
264  $r=-0.279$ , 95% CI -0.299 to -0.258,  $p<0.0001$ , respectively, Table 1). Once they were  
265 adjusted for FSVV, alcohol, sugary beverages, and potatoes by partial correlation analysis; they  
266 all correlated positively with CVD ( $r=0.028$ , 95% CI 0.006 to 0.050,  $p=0.0144$ ,  $r=0.076$ , 95% CI  
267 0.054 to 0.098,  $p<0.0001$ ,  $r=0.170$ , 95% CI 0.148 to 0.191,  $p<0.0001$ , respectively). In the  
268 cohorts with  $FSVV \geq 567.3$  KC/d, BMI and FPG positively correlated with CVD ( $r=0.484$ , 95%  
269 CI 0.434 to 0.530,  $p<0.0001$  and  $r=0.091$ , 95% CI 0.028 to 0.153,  $p=0.0046$ , respectively).

270

## 271 Discussion

272 Why, in high FSVV cohorts, ( $FSVV \geq 567.4$  KC/d), LDL-c correlated negatively with FSVV ( $r=-$   
273  $0.571$  95% CI  $-0.612$  to  $-0.528$ ,  $p < 0.0001$ ,  $n=974$  cohorts) but positively correlated with LSVV  
274 worldwide ( $r=0.780$ , 95% CI  $0.771$  to  $0.788$ ,  $p < 0.0001$ ) is not entirely clear. However, multiple  
275 studies have documented that LDLc may be influenced by genetic, racial, or ethnic differences  
276 that do not necessarily correspond with risk of CVD.[22, 23] Additionally, LDLc lowering  
277 medications in wide use especially in high FSVV developed countries may also confound the  
278 relationship of LDLc with both LSVV and CVD risk in this subset cohort analysis.

279  
280 Since there are high FSVV and low FSVV individual people widely distributed worldwide,  
281 prospective observational studies of individuals in high FSVV areas, rather than GBD cohort  
282 studies, could better demonstrate positive correlations between LDLc (or total cholesterol) and  
283 CVD. This may explain why the Seven Countries Study[24] of Ancel Keys and the Framingham  
284 Heart Study,[25] both in high FSVV regions, supported the lipid hypothesis. However, the  
285 Prospective Urban Rural Epidemiology (PURE) Study, with individual data on 135,335 patients  
286 from three high-income, 11 middle-income, and four low-income countries was clearly  
287 at variance with the lipid hypothesis.[26] The PURE Study found that higher saturated fat intake  
288 was associated with lower risk of stroke (quintile 5 vs quintile 1, HR 0.79, (95% CI 0.64 to 0.98),  
289  $p_{\text{trend}}=0.0498$ ).

290  
291 This global data analysis supports the fat-soluble vitamin hypothesis or possibly another  
292 mechanism that accounts for FSVV KC/d being negatively correlated with CVD worldwide ( $r=-$   
293  $0.308$ , 95% CI  $-0.358$  to  $-0.257$ ,  $p < 0.0001$ , Table 1).

294  
295 Given the negative correlations of CVD with both fish and eggs in both tables 1 and 5, the  
296 reduction in FSVV might best come from meat, poultry, and added fats. Although milk  
297 (including other dairy products) correlated positively with CVD in Table 5 ( $r=0.185$ , 95% CI  
298 0.123 to 0.245,  $p<0001$ ), this probably related to Japan and Peru having the lowest and fifth  
299 lowest CVD in Table 3 (Japan: mean CVD=169.2, mean milk=29.0 KC/d, Peru: mean  
300 CVD=197.7, mean milk=15.3 KC/d). Without Japan and Peru in the analysis ( $n=834$  cohorts),  
301 milk correlated negatively with CVD ( $r=-0.071$ , 95% CI -0.138 to -0.030,  $p=0.0405$ ). Of the 34  
302 low CVD countries in Table 3, 20 had high milk intakes (mean milk  $\geq 68.8$  KC/d versus mean  
303 milk worldwide=25.0 KC/d) and these all had relatively high per capita intakes of cheese.[27,  
304 28] Fermented, full-fat dairy products have high levels of vitamin K2,[6, 7] which have been  
305 found to be important in preventing calcification of arteries and atherosclerosis.[29]  
306  
307 Table 4 shows that the Japanese, with low milk KC/d intake (mean milk=29.0 KC/d), had the  
308 world's lowest CVD (mean CVD=169.2) while crucial risk factors were high (e.g., smoking:  
309 mean male/female smoking=26.8%, salt intake (mean sodium= 6.01 g/d, systolic blood pressure  
310 (mean SBP= 137.6 mm/Hg). Additionally, relative to fermented cheeses, the content of vitamin  
311 K2 in fish is low to negligible.[7] Instead, Japanese consume high quantities of vitamin K2 in the  
312 form of fermented soy products like natto and miso.[8, 9] As noted in the introduction, people in  
313 Taiwan and South Korea (also listed among low CVD countries) also have high intakes of  
314 fermented legumes.

315



316 Potatoes KC/d available positively correlated with CVD both worldwide ( $r=0.050$ , 95% CI 0.028  
317 to 0.073,  $p<0.0001$ , Table 1) and in cohorts with  $FSVV \geq 567.3$  KC/d ( $r=0.109$ , 95% CI 0.046 to  
318 0.170,  $p<0.0001$ , Table 5). Notably, half, or more of the potatoes consumed worldwide are in  
319 the form of highly processed food products.[30] Recent large prospective observational studies  
320 have found higher consumption of ultra-processed foods associated with an increased risk of  
321 cardiovascular disease incidence and CVD mortality.[31, 32] Data from 79 high- and middle-  
322 income countries show that ultra-processed products dominate the food supplies of high-income  
323 countries and that their consumption is now rapidly increasing in middle-income countries.[33]  
324  
325 The finding that sodium negatively correlated with CVD worldwide ( $r=-0.213$ , 95% CI -0.234 to  
326 -0.192,  $p<0.0001$ ) is contrary to an analysis of sodium intake versus cardiovascular deaths in 66  
327 countries by Mozaffarian, et. al who attributed 9.5% of cardiovascular deaths worldwide to high  
328 sodium intake.[34] However, O'Donnell and colleagues found the relationship of sodium to  
329 cardiovascular disease to be J shaped curve and suggested that the lowest cardiovascular risk is  
330 with moderate sodium intake in the 3-5 g/d range.[35]  
331  
332 The positive correlation of physical activity with CVD was surprising (Table 1). However, (1)  
333 countries with higher FSVV KC/d levels also had less physical activity (FSVV versus physical  
334 activity:  $r=-0.366$ , 95% CI: -0.385 to -0.347,  $p<0.0001$ ), (2) females had less physical activity  
335 than males (mean physical activity males=5061 METs/week, mean physical activity  
336 females=4356 METs/week), along with less CVD (mean CVD males=656.2, mean CVD  
337 females=428.6), and (3) males smoked tobacco more than females (mean smoking (0-1)  
338 males=0.339 or 33.9%, mean smoking (0-1) females=0.070 or 7%). When FSVV, sex, and

339 smoking were held constant, physical activity correlated negatively with CVD worldwide ( $r = -$   
340  $0.126$ , 95% CI  $-0.148$  to  $-0.104$ ,  $p < 0.0001$ ).

341  
342 The moderately strong positive correlation of child  $\leq 5$  years old severe underweight ( $> 2$  SD  
343 below the mean for height) with CVD worldwide ( $r = 0.306$ , 95% CI  $0.285$  to  $0.325$ ,  $p < 0.0001$ ,  
344 Table 1) suggested a relationship of infant/child malnutrition with later CVD. Babies surviving  
345 the so called “Dutch famine” toward the end of the second world war (1944-45) have been  
346 shown to have higher subsequent heart disease than earlier or later cohorts in Holland.[36] This  
347 suggested that in utero and early infancy severe malnutrition may subsequently contribute  
348 substantially to CVD, especially in developing countries.

349  
350 Prematurely stopping breast feeding positively correlated with CVD in the countries with FSVV  
351  $\geq 567.3$  KC/d ( $r = 0.268$  95% CI:  $0.208$  to  $0.325$ ,  $p = 0.0027$ , Table 5). In those countries,  
352 prematurely stopping breast feeding was more common than in developing countries (range (0-  
353 1):  $0.129$  to  $0.268$ , mean  $= 0.196$ ). A review of observational studies, in developed countries, of  
354 breast feeding related to metabolic risk factors for CVD suggested that breast feeding was  
355 associated with increased insulin sensitivity and decreased systolic blood pressure in later life.  
356 Breast feeding also has metabolic benefits for the mother.[37]

357  
358 According to The World Health Organisation, ambient air pollution (particulate  
359 matter  $\leq 2.5$  micrometers diameter (PM<sub>2.5</sub>)) causes cardiovascular and respiratory diseases and  
360 cancers.[38] The WHO considers  $\geq 10$   $\mu\text{g}/\text{m}^3$  of PM<sub>2.5</sub> particles a health hazard. In this  
361 analysis, the ambient air pollution (PM<sub>2.5</sub>) in the countries with FSVV  $\geq 567.3$  KC/d

362 averaged 12.7  $\mu\text{g}/\text{m}^3$  and mean CVD=273.7 from 1990 to 2017 (Table 5). Worldwide,  
363 comparable numbers were mean CVD=543.7 and air pollution (PM<sub>2.5</sub>) mean=44.7  $\mu\text{g}/\text{m}^3$ .  
364  
365 These IHME GBD data support the link of smoking tobacco to CVD ( $r=0.298$ , 95% CI  
366 0.278 to 0.318,  $p<0.0001$ , Table 1). However, given the multiple dietary and other  
367 contributors, the CVD population attributable risk for smoking is probably far below  
368 the World Health Organization estimate that tobacco accounts for 20% of coronary  
369 artery disease mortality.[39] The mean incidence of smoking worldwide=20.5%  
370 (Table 1). In the 34 countries with the lowest CVD, the mean smoking  
371 incidence=23.3% ( $n=974$  cohorts). Smoking was clearly a major risk factor for CVD,  
372 but these data suggest that diet was more influential  
373  
374 The positive correlation of blood lead levels with CVD worldwide ( $r=0.180$ , 95% CI 0.159 to  
375 0.201,  $p<0.0001$ , Table 1) is consistent with reports that lead toxicity leads to hypertension.[40]  
376 Also, environmental lead exposure has been linked with all-cause mortality,  
377 cardiovascular disease mortality, and ischaemic heart disease mortality in the  
378 US.[41]  
379  
380 This analysis showed that kidney disease correlated positively with CVD ( $r=0.194$ , 95% CI  
381 0.173 to 0.215,  $p<0.0001$ , Table 1). A systematic GBD review of kidney disease revealed that  
382 chronic kidney disease resulted in an estimated 1.2 million deaths in 2017, of which a large  
383 portion were from CVD.[42] Other CVD risk factors may also lead to kidney disease (e.g.,  
384 systolic hypertension, types 1 and 2 diabetes).

385

## 386 Meaning of the study

387 The meaning of the study can be said to be in attempting to answer the appeal of influential  
388 Stanford University meta researcher, Dr. John Ioannidis, who called for radical reform of all  
389 nutritional epidemiology methodologies used to influence food/agricultural policies and to  
390 produce dietary guidelines for clinicians and the public.[43] Currently, no methodology for  
391 relating cardiovascular disease events to food intake and other risk factors has been generally  
392 accepted as rigorous, replicable, and scientifically valid.

393

## 394 Strength and limitations of this study

395 One strength of our study is in the creation of our population weighted database of worldwide  
396 cohorts with the health outcome of CVD and 43 potentially associated risk factors. Another  
397 strength was to define the fat-soluble vitamin variable, allowing for assessment of both the lipid  
398 hypothesis and the fat-soluble vitamin hypothesis.

399

400 Our study was subject to all the limitations discussed in previous GBD publications.[44, 45]  
401 These included gaps, biases, and inconsistencies in data sources as well as limitations in the  
402 methods of data processing and estimation. Having comprehensive data on dietary inputs is key  
403 to more accurate and reliable analyses. The GBD data on animal foods, plant foods, alcohol,  
404 sugary beverages, and fatty acids were not comprehensive and comprised only 1191.4 KC/d per  
405 person on average worldwide. Subnational data on all risk factors were available on only four  
406 countries. Because the data formatting and statistical methodology were new, this was  
407 necessarily a post hoc analysis and no pre-analysis protocol was possible. This GBD data

408 analysis should be repeated with the most recently released GBD 2019 data when it becomes  
409 available to volunteer collaborators.

410

### 411 **Generalisability**

412 This new methodology presented for probing the GBD raw data to find correlations between  
413 dietary and other risk factors and health outcomes (e.g., CVD) can be applied to any of the risk  
414 factors and health outcomes available with the new IHME GBD 2019 data.

415

### 416 **Conclusion**

417 The lipid hypothesis (e.g., dietary SFA and cholesterol from animal foods causing CVD) was  
418 consistent with the strong positive correlation of FSVV with CVD in high FSVV cohorts but not  
419 worldwide. Global data analysis supported the fat-soluble vitamin hypothesis, because FSVV  
420 negatively correlated with CVD worldwide. Defining the optimal FSVV that will reduce CVD  
421 risk while not increasing other diseases (e.g., cancers and obesity) will require more research.  
422 Supplements of fat-soluble vitamins to reduce the FSVV required to minimise CVD should be  
423 studied, especially in developing countries with less access to animal foods.

424

425 This methodology of analysing IHME GBD data should augment systematic literature reviews in  
426 developing policy recommendations, clinical practice guidelines, and public health  
427 recommendations. GBD data analysis can bring more rigor, precision, and consensus to the field  
428 of population health, especially in the areas of dietary risk factors.

429

## 430 WHAT IS ALREADY KNOWN ON THIS TOPIC

431 The lipid hypothesis, which has been widely accepted for at least 40 years, has recently been  
432 disputed with no resolution.

## 433 WHAT THIS STUDY ADDS

434 This study with worldwide cohorts suggests that the lipid hypothesis applies only to cohorts (and  
435 individuals by inference) with high intakes animal foods and added fats. Insufficient intake of  
436 foods containing the fat-soluble vitamins and added fats may account for considerably more  
437 cardiovascular mortality than too much animal foods and added fats.

438

439 **Table 1. Dietary and other risks related to CVD worldwide (n=7846 cohorts)**  
 440

| CVD and CVD risk factors                                 | Mean   | SD     | Min    | Max     | r      | 95% CI | 95% CI | p      |
|----------------------------------------------------------|--------|--------|--------|---------|--------|--------|--------|--------|
| Cardiovascular disease deaths/100k/year ages 15-69 (CVD) | 543.66 | 288.01 | 73.47  | 1844    |        |        |        |        |
| CVD mean m/f                                             | 543.69 | 246.13 | 135.46 | 1727    | 0.855  | 0.849  | 0.860  | <.0001 |
| LDL cholesterol mmol/L                                   | 2.35   | 0.40   | 1.27   | 3.25    | -0.279 | -0.299 | -0.258 | <.0001 |
| Fat-soluble vitamin variable (FSVV)                      | 285.36 | 193.31 | 58.78  | 932.18  | -0.329 | -0.349 | -0.309 | <.0001 |
| Processed meat KC/d                                      | 5.33   | 9.72   | 0.20   | 68.77   | -0.204 | -0.226 | -0.183 | <.0001 |
| Red meat KC/d                                            | 50.27  | 45.13  | 3.21   | 235.95  | -0.232 | -0.253 | -0.211 | <.0001 |
| Fish KC/d                                                | 9.99   | 36.52  | 0.40   | 370.36  | -0.203 | -0.224 | -0.181 | <.0001 |
| Milk KC/d                                                | 25.04  | 27.05  | 1.06   | 146.82  | -0.192 | -0.214 | -0.171 | <.0001 |
| Poultry KC/d available                                   | 44.32  | 50.08  | 1.06   | 411.87  | -0.289 | -0.309 | -0.268 | <.0001 |
| Eggs KC/d available                                      | 19.36  | 14.71  | 0.79   | 69.64   | -0.390 | -0.408 | -0.371 | <.0001 |
| Added Saturated fatty acids KC/d                         | 87.67  | 29.41  | 32.56  | 221.29  | -0.239 | -0.260 | -0.219 | <.0001 |
| Added PUFAs KC/d                                         | 37.30  | 33.78  | 1.35   | 175.40  | -0.316 | -0.336 | -0.296 | <.0001 |
| Added Trans fatty acids KC/d                             | 6.09   | 6.28   | 0.91   | 35.77   | -0.104 | -0.126 | -0.082 | <.0001 |
| Alcohol KC/d                                             | 81.03  | 57.33  | 4.25   | 429.81  | -0.061 | -0.083 | -0.039 | <.0001 |
| Sugary beverages KC/d                                    | 298.36 | 152.38 | 72.91  | 1472.00 | 0.113  | 0.091  | 0.135  | <.0001 |
| Potatoes KC/d available                                  | 84.04  | 74.60  | 3.07   | 533.88  | 0.050  | 0.028  | 0.073  | <.0001 |
| Corn KC/d available                                      | 34.72  | 48.28  | 0.16   | 305.17  | -0.062 | -0.084 | -0.040 | <.0001 |
| Fruits KC/d                                              | 40.21  | 22.50  | 3.58   | 161.39  | -0.355 | -0.374 | -0.336 | <.0001 |
| Vegetables KC/d                                          | 79.76  | 43.12  | 9.48   | 304.17  | -0.107 | -0.128 | -0.085 | <.0001 |
| Nuts and seeds KC/d                                      | 8.41   | 8.36   | 0.05   | 102.99  | -0.277 | -0.297 | -0.256 | <.0001 |
| Whole grains KC/d                                        | 55.65  | 30.93  | 1.14   | 235.10  | -0.194 | -0.216 | -0.173 | <.0001 |
| Legumes KC/d                                             | 51.74  | 32.23  | 0.51   | 194.70  | -0.024 | -0.046 | -0.002 | 0.0319 |
| Rice KC/d available                                      | 141.86 | 116.34 | 1.42   | 461.80  | 0.007  | -0.015 | 0.029  | 0.5417 |
| Sweet potatoes KC/d available                            | 22.76  | 35.95  | 0.02   | 364.74  | -0.167 | -0.189 | -0.146 | <.0001 |
| Total KC/d available                                     | 2574   | 418    | 1579   | 3898    | -0.203 | -0.224 | -0.181 | <.0001 |
| Vit A deficiency children/100k/yr                        | 23205  | 10939  | 1267   | 50969   | 0.210  | 0.189  | 0.231  | <.0001 |
| Sodium g/d                                               | 4.45   | 2.34   | 1.33   | 9.21    | -0.214 | -0.235 | -0.193 | <.0001 |
| Calcium g/d                                              | 0.301  | 0.179  | 0.081  | 1.044   | -0.169 | -0.191 | -0.148 | <.0001 |
| Dietary fiber g/d                                        | 9.21   | 3.15   | 2.72   | 22.68   | 0.019  | -0.003 | 0.041  | 0.0932 |
| Physical activity METs                                   | 4714   | 1368   | 1609   | 7669    | 0.160  | 0.139  | 0.182  | <.0001 |
| Child underweight >2SD                                   | 0.186  | 0.171  | 0.004  | 0.535   | 0.302  | 0.282  | 0.322  | <.0001 |
| Stop breast feeding <6 months                            | 0.119  | 0.055  | 0.016  | 0.242   | -0.302 | -0.322 | -0.282 | <.0001 |
| Ambient pollution PM <sub>0.25</sub>                     | 44.73  | 26.46  | 4.38   | 95.54   | 0.153  | 0.131  | 0.174  | <.0001 |
| Smoking rate (0-1)                                       | 0.205  | 0.176  | 0.003  | 0.640   | 0.297  | 0.277  | 0.317  | <.0001 |
| Secondhand smoking (0-1)                                 | 0.376  | 0.155  | 0.164  | 0.796   | -0.225 | -0.246 | -0.204 | <.0001 |
| Sublingual tobacco rate (0-1)                            | 0.068  | 0.095  | 0.001  | 0.419   | 0.284  | 0.264  | 0.304  | <.0001 |
| Blood lead level mcg/dl                                  | 5.01   | 1.01   | 1.22   | 8.37    | 0.180  | 0.159  | 0.201  | <.0001 |
| Household air pollution (0-1)                            | 0.482  | 0.325  | 0.000  | 0.996   | 0.179  | 0.158  | 0.201  | <.0001 |
| Kidney disease stage III (0-1)                           | 0.056  | 0.028  | 0.015  | 0.154   | 0.194  | 0.173  | 0.215  | <.0001 |
| Type 1 DM early deaths                                   | 10.37  | 9.39   | 0.55   | 112.49  | 0.340  | 0.320  | 0.359  | <.0001 |
| Type 2 DM early deaths                                   | 17.50  | 15.65  | 0.63   | 269.67  | 0.227  | 0.205  | 0.247  | <.0001 |
| BMI kg/M <sup>2</sup>                                    | 21.77  | 2.29   | 17.95  | 29.39   | -0.240 | -0.261 | -0.219 | <.0001 |
| Fasting plasma glucose mmol/L                            | 4.30   | 0.35   | 3.32   | 5.58    | -0.178 | -0.200 | -0.157 | <.0001 |
| Systolic BP mm Hg                                        | 133.91 | 4.32   | 123.41 | 147.89  | 0.195  | 0.174  | 0.216  | <.0001 |
| Socio-demographic index (0-1)                            | 0.543  | 0.174  | 0.112  | 0.896   | -0.337 | -0.357 | -0.317 | <.0001 |
| Sex male 1 and female 2                                  | 1.50   | 0.50   | 1.00   | 2.00    | -0.395 | -0.414 | -0.376 | <.0001 |

441

442

443 **Table 2. CVD lowest and highest 1000 cohorts (≈1 billion people)**

| CVD and risk factors                           | CVD lowest ≈1 billion people (n=1000 cohorts) |        |        |        | CVD highest ≈1 billion people (n=1000 cohorts) |        |        |        |
|------------------------------------------------|-----------------------------------------------|--------|--------|--------|------------------------------------------------|--------|--------|--------|
|                                                | Mean                                          | SD     | Min    | Max    | Mean                                           | SD     | Min    | Max    |
| <b>Cardiovascular Disease deaths/100k/year</b> | 227.81                                        | 95.25  | 73.47  | 422.36 | 1045                                           | 356.90 | 430.20 | 1844   |
| <b>CVD male/female mean</b>                    | 227.81                                        | 42.52  | 135.46 | 292.97 | 1045                                           | 200.47 | 802.24 | 1727   |
| <b>LDL cholesterol mmol/L</b>                  | 2.808                                         | 0.256  | 1.598  | 3.247  | 2.376                                          | 0.380  | 1.35   | 3.20   |
| <b>Fat-soluble vitamin variable (FSVV)</b>     | 531.4                                         | 180.20 | 143.63 | 912.69 | 235.66                                         | 99.68  | 80.53  | 503.98 |
| <b>Processed meat KC/d</b>                     | 15.30                                         | 12.20  | 0.61   | 61.09  | 3.70                                           | 4.95   | 0.22   | 18.12  |
| <b>Red meat KC/d</b>                           | 90.72                                         | 48.06  | 12.03  | 235.95 | 36.82                                          | 29.40  | 7.07   | 172.00 |
| <b>Fish KC/d</b>                               | 49.54                                         | 92.63  | 2.85   | 370.36 | 4.56                                           | 2.69   | 0.78   | 12.97  |
| <b>Milk KC/d</b>                               | 55.64                                         | 35.39  | 7.70   | 146.82 | 25.61                                          | 16.78  | 1.06   | 75.87  |
| <b>Poultry KC/d available</b>                  | 90.44                                         | 47.27  | 4.74   | 240.56 | 30.23                                          | 22.39  | 2.78   | 100.04 |
| <b>Eggs KC/d available</b>                     | 36.63                                         | 11.25  | 4.77   | 69.64  | 14.73                                          | 13.63  | 1.51   | 46.81  |
| <b>Added Saturated fatty acids KC/d</b>        | 113.40                                        | 36.53  | 59.52  | 221.29 | 87.22                                          | 24.03  | 33.03  | 205.85 |
| <b>Added PUFAs KC/d</b>                        | 69.80                                         | 35.78  | 15.77  | 175.40 | 25.48                                          | 14.54  | 2.73   | 84.90  |
| <b>Added Trans fatty acids KC/d</b>            | 9.91                                          | 9.25   | 1.65   | 34.90  | 7.31                                           | 8.62   | 1.21   | 35.77  |
| <b>Alcohol KC/d</b>                            | 119.72                                        | 66.67  | 4.25   | 296.70 | 45.83                                          | 46.24  | 5.77   | 340.37 |
| <b>Sugary beverages KC/d</b>                   | 320.29                                        | 251.94 | 72.91  | 1472   | 303.30                                         | 63.68  | 180.80 | 685.42 |
| <b>Potatoes KC/d available</b>                 | 81.34                                         | 51.14  | 9.50   | 177.30 | 98.34                                          | 96.77  | 3.94   | 533.88 |
| <b>Corn KC/d available</b>                     | 48.19                                         | 75.26  | 1.79   | 287.14 | 31.77                                          | 37.30  | 0.20   | 305.17 |
| <b>Fruits KC/d</b>                             | 64.84                                         | 16.49  | 23.05  | 128.61 | 31.23                                          | 13.93  | 3.58   | 70.11  |
| <b>Vegetables KC/d</b>                         | 108.02                                        | 44.60  | 9.48   | 214.26 | 83.83                                          | 56.67  | 14.43  | 198.51 |
| <b>Nuts and seeds KC/d</b>                     | 15.90                                         | 10.50  | 0.66   | 39.80  | 4.81                                           | 2.91   | 0.05   | 17.91  |
| <b>Whole grains KC/d</b>                       | 64.71                                         | 38.62  | 1.61   | 173.46 | 28.30                                          | 33.01  | 1.14   | 156.75 |
| <b>Legumes KC/d</b>                            | 47.88                                         | 25.99  | 2.95   | 133.26 | 31.55                                          | 18.93  | 0.51   | 103.17 |
| <b>Rice KC/d available</b>                     | 78.10                                         | 97.95  | 7.58   | 349.08 | 75.93                                          | 107.38 | 1.42   | 461.80 |
| <b>Sweet potatoes KC/d available</b>           | 3.92                                          | 5.14   | 0.04   | 27.51  | 5.84                                           | 20.20  | 0.02   | 364.74 |
| <b>Total KC/d available</b>                    | 2972                                          | 409    | 1948   | 3572   | 2627                                           | 409    | 1579   | 3254   |
| <b>Vit A deficiency children/100k/yr</b>       | 14181                                         | 8723   | 1400   | 44100  | 20559                                          | 11395  | 1722   | 50969  |
| <b>Sodium g/d</b>                              | 3.92                                          | 1.22   | 1.33   | 6.70   | 3.30                                           | 0.76   | 1.33   | 5.96   |
| <b>Calcium g/d</b>                             | 0.506                                         | 0.189  | 0.183  | 1.044  | 0.321                                          | 0.150  | 0.089  | 0.792  |
| <b>Dietary fiber g/d</b>                       | 10.58                                         | 2.90   | 5.15   | 17.95  | 9.53                                           | 3.32   | 3.87   | 18.83  |
| <b>Physical activity METs</b>                  | 3802                                          | 1164   | 2162   | 7607   | 4273                                           | 1497   | 1838   | 7607   |
| <b>Child underweight &gt;2SD</b>               | 0.038                                         | 0.043  | 0.004  | 0.242  | 0.186                                          | 0.141  | 0.011  | 0.411  |
| <b>Stop breast feeding &lt;6 mo</b>            | 0.176                                         | 0.032  | 0.071  | 0.218  | 0.116                                          | 0.044  | 0.036  | 0.208  |
| <b>Ambient pollution PM<sub>0.25</sub></b>     | 17.60                                         | 8.27   | 4.38   | 38.42  | 40.81                                          | 22.19  | 7.90   | 77.69  |
| <b>Smoking rate (0-1)</b>                      | 0.217                                         | 0.121  | 0.012  | 0.448  | 0.212                                          | 0.190  | 0.005  | 0.627  |
| <b>Secondhand smoking (0-1)</b>                | 0.328                                         | 0.097  | 0.164  | 0.569  | 0.397                                          | 0.158  | 0.164  | 0.780  |
| <b>Sublingual tobacco rate (0-1)</b>           | 0.010                                         | 0.015  | 0.001  | 0.111  | 0.060                                          | 0.072  | 0.001  | 0.238  |
| <b>Blood lead level mcg/dl</b>                 | 4.08                                          | 1.00   | 1.22   | 6.85   | 4.74                                           | 1.28   | 1.92   | 8.37   |
| <b>Household air pollution (0-1)</b>           | 0.103                                         | 0.182  | 0.001  | 0.839  | 0.404                                          | 0.353  | 0.002  | 0.993  |
| <b>Kidney disease stage III (0-1)</b>          | 0.042                                         | 0.020  | 0.015  | 0.111  | 0.078                                          | 0.024  | 0.035  | 0.139  |
| <b>Type 1 DM early deaths</b>                  | 4.79                                          | 3.88   | 0.59   | 20.65  | 16.38                                          | 15.31  | 2.62   | 112.49 |
| <b>Type 2 DM early deaths</b>                  | 15.69                                         | 18.23  | 0.75   | 87.92  | 23.65                                          | 24.88  | 0.89   | 269.67 |
| <b>BMI kg/M<sup>2</sup></b>                    | 23.74                                         | 1.60   | 19.61  | 27.06  | 22.46                                          | 2.15   | 17.95  | 26.08  |
| <b>Fasting plasma glucose mmol/L</b>           | 4.56                                          | 0.25   | 3.54   | 5.12   | 4.28                                           | 0.42   | 3.38   | 5.18   |
| <b>Systolic BP mm Hg</b>                       | 133.26                                        | 4.41   | 123.41 | 142.15 | 136.86                                         | 4.39   | 124.59 | 147.89 |
| <b>Socio-demographic index (0-1)</b>           | 0.757                                         | 0.125  | 0.351  | 0.896  | 0.497                                          | 0.183  | 0.186  | 0.824  |
| <b>Sex male 1 and female 2</b>                 | 1.50                                          | 0.50   | 1.00   | 2.00   | 1.50                                           | 0.50   | 1.00   | 2.00   |

444



445 **Table 3. CVD related to fat-soluble vitamin related risk factors in low CVD countries**

| <b>CVD lowest Countries (n=1000 cohorts), Table 3</b> | <b>n cohorts</b> | <b>CVD ascending order</b> | <b>FSVV</b> | <b>Processed meat</b> | <b>Red meat</b> | <b>Fish</b> | <b>Milk</b> | <b>Poultry</b> | <b>Eggs</b> | <b>Added SFA +PUFA +TFA</b> |
|-------------------------------------------------------|------------------|----------------------------|-------------|-----------------------|-----------------|-------------|-------------|----------------|-------------|-----------------------------|
| <b>Japan</b>                                          | 158              | 169.19                     | 618.69      | 19.19                 | 58.72           | 260.54      | 29.04       | 63.93          | 52.23       | 135.04                      |
| <b>France</b>                                         | 64               | 174.00                     | 644.78      | 13.59                 | 135.07          | 11.17       | 95.75       | 99.86          | 43.30       | 246.04                      |
| <b>Switzerland</b>                                    | 8                | 175.04                     | 558.41      | 11.50                 | 129.01          | 6.75        | 110.90      | 55.57          | 31.20       | 213.47                      |
| <b>Andorra</b>                                        | 2                | 185.55                     | 763.18      | 16.58                 | 150.84          | 16.44       | 99.23       | 189.92         | 47.55       | 242.62                      |
| <b>Peru</b>                                           | 32               | 197.74                     | 183.12      | 1.01                  | 16.92           | 3.82        | 15.34       | 35.04          | 12.03       | 98.95                       |
| <b>Spain</b>                                          | 46               | 206.25                     | 597.93      | 11.65                 | 139.92          | 10.28       | 82.99       | 113.88         | 43.35       | 195.86                      |
| <b>Italy</b>                                          | 60               | 206.44                     | 587.57      | 15.78                 | 126.36          | 9.15        | 89.54       | 84.16          | 36.39       | 226.20                      |
| <b>Iceland</b>                                        | 2                | 206.51                     | 609.62      | 11.97                 | 112.73          | 11.67       | 85.37       | 63.57          | 29.51       | 294.81                      |
| <b>Australia</b>                                      | 24               | 208.03                     | 698.26      | 9.79                  | 164.14          | 14.15       | 97.05       | 153.33         | 24.92       | 234.89                      |
| <b>Canada</b>                                         | 36               | 222.11                     | 624.98      | 25.31                 | 126.28          | 18.48       | 76.13       | 147.46         | 34.94       | 196.39                      |
| <b>Israel</b>                                         | 8                | 228.32                     | 662.00      | 5.95                  | 59.50           | 15.35       | 68.79       | 240.56         | 40.54       | 231.30                      |
| <b>South Korea</b>                                    | 50               | 232.63                     | 357.23      | 5.97                  | 82.88           | 5.96        | 15.72       | 43.10          | 26.89       | 176.71                      |
| <b>Belgium</b>                                        | 12               | 235.98                     | 636.39      | 12.28                 | 122.36          | 11.19       | 93.44       | 85.00          | 33.28       | 278.86                      |
| <b>Netherlands</b>                                    | 18               | 236.61                     | 629.56      | 15.72                 | 133.06          | 8.66        | 114.16      | 72.70          | 41.67       | 243.59                      |
| <b>Taiwan</b>                                         | 24               | 237.37                     | 587.36      | 3.01                  | 106.58          | 9.15        | 15.95       | 132.38         | 34.87       | 285.41                      |
| <b>Mexico</b>                                         | 108              | 237.55                     | 413.25      | 11.29                 | 63.03           | 8.69        | 34.29       | 85.85          | 39.92       | 170.19                      |
| <b>Panama</b>                                         | 4                | 244.31                     | 383.83      | 2.75                  | 61.32           | 9.44        | 20.72       | 95.43          | 12.96       | 181.23                      |
| <b>Sweden</b>                                         | 10               | 247.21                     | 563.83      | 29.31                 | 119.77          | 11.80       | 124.13      | 45.42          | 35.04       | 198.37                      |
| <b>New Zealand non Mauri</b>                          | 4                | 247.32                     | 699.81      | 9.31                  | 158.86          | 11.56       | 88.74       | 128.14         | 40.24       | 262.95                      |
| <b>Norway</b>                                         | 32               | 248.72                     | 605.30      | 48.14                 | 109.37          | 10.10       | 100.96      | 41.65          | 31.52       | 263.56                      |
| <b>England</b>                                        | 20               | 253.09                     | 534.56      | 19.21                 | 96.29           | 10.70       | 87.80       | 89.30          | 32.90       | 198.36                      |
| <b>Costa Rica</b>                                     | 4                | 260.73                     | 408.42      | 2.63                  | 51.74           | 8.12        | 46.55       | 78.05          | 28.17       | 193.14                      |
| <b>Luxembourg</b>                                     | 2                | 262.53                     | 578.00      | 14.65                 | 163.17          | 11.79       | 91.99       | 71.48          | 27.60       | 197.32                      |
| <b>Chile</b>                                          | 18               | 267.50                     | 404.12      | 19.11                 | 90.33           | 9.65        | 31.93       | 97.29          | 19.70       | 136.10                      |
| <b>Guatemala</b>                                      | 16               | 269.85                     | 231.05      | 1.89                  | 20.05           | 5.28        | 13.32       | 53.94          | 30.46       | 106.12                      |
| <b>Kenya</b>                                          | 12               | 270.04                     | 150.04      | 1.41                  | 25.83           | 3.09        | 18.89       | 4.74           | 4.77        | 91.31                       |
| <b>Ecuador</b>                                        | 16               | 270.64                     | 375.35      | 6.87                  | 56.88           | 7.34        | 35.51       | 59.92          | 14.66       | 194.16                      |
| <b>USA</b>                                            | 94               | 274.00                     | 825.54      | 36.45                 | 136.35          | 15.79       | 90.90       | 190.90         | 41.10       | 314.05                      |
| <b>Denmark</b>                                        | 6                | 275.10                     | 600.48      | 14.46                 | 137.75          | 13.38       | 98.01       | 74.42          | 45.96       | 216.51                      |
| <b>Austria</b>                                        | 8                | 277.67                     | 621.00      | 8.95                  | 194.65          | 9.26        | 98.68       | 70.00          | 39.96       | 199.50                      |
| <b>Portugal</b>                                       | 10               | 278.50                     | 524.81      | 5.16                  | 124.77          | 8.77        | 79.43       | 94.26          | 24.18       | 188.25                      |
| <b>Nicaragua</b>                                      | 6                | 282.04                     | 214.24      | 1.52                  | 14.93           | 4.07        | 20.66       | 41.76          | 17.41       | 113.90                      |
| <b>Tehran (Iran)</b>                                  | 16               | 283.29                     | 299.65      | 1.23                  | 22.63           | 5.36        | 19.23       | 65.90          | 18.89       | 166.41                      |
| <b>Thailand</b>                                       | 70               | 289.91                     | 247.43      | 0.70                  | 32.01           | 6.95        | 7.85        | 57.07          | 31.10       | 111.75                      |
| <b>Total cohorts</b>                                  | 1000             |                            |             |                       |                 |             |             |                |             |                             |

447 **Table 4. Representative examples of low CVD countries (n=1000 cohorts) including all risk**  
 448 **factors**

| CVD and CVD risk factors                                     | Japan <sup>a</sup> | France <sup>b</sup> | Peru <sup>c</sup>  | Mexico <sup>d</sup> | Panama <sup>e</sup>        | Guatemala <sup>f</sup>     | Ecuador <sup>g</sup> |
|--------------------------------------------------------------|--------------------|---------------------|--------------------|---------------------|----------------------------|----------------------------|----------------------|
| n cohorts                                                    | 158                | 64                  | 32                 | 108                 | 4                          | 16                         | 16                   |
| CVD/100k/year ages 15-69                                     | 169.19             | 174.00              | 197.74             | 237.55              | 244.31                     | 269.85                     | 270.64               |
| Fat-soluble vitamin variable                                 | 618.69             | 644.78              | 183.12             | 413.25              | 383.83                     | 231.05                     | 375.35               |
| LDL cholesterol mmol/L                                       | 2.81               | 3.08                | 2.37               | 2.59                | 2.61                       | 2.20                       | 2.46                 |
| Processed meat KC/d                                          | 19.19              | 13.59               | 1.01               | 11.29               | 2.75                       | 1.89                       | 6.87                 |
| Red meat KC/d                                                | 58.72              | 135.07              | 16.92              | 63.03               | 61.32                      | 20.05                      | 56.88                |
| Fish KC/d                                                    | 260.54             | 11.17               | 3.82               | 8.69                | 9.44                       | 5.28                       | 7.34                 |
| Milk KC/d                                                    | 29.04              | 95.75               | 15.34              | 34.29               | 20.72                      | 13.32                      | 35.51                |
| Poultry KC/d available                                       | 63.93              | 99.86               | 35.04              | 85.85               | 95.43                      | 53.94                      | 59.92                |
| Eggs KC/d available                                          | 52.23              | 43.30               | 12.03              | 39.92               | 12.96                      | 30.46                      | 14.66                |
| Added Saturated fatty acids KC/d                             | 77.73              | 172.79              | 68.34              | 89.13               | 101.32                     | 60.62                      | 133.54               |
| Added PUFAs KC/d                                             | 53.78              | 67.38               | 24.47              | 52.14               | 72.29                      | 41.90                      | 51.69                |
| Added Trans fatty acids KC/d                                 | 3.54               | 5.88                | 6.13               | 28.92               | 7.62                       | 3.60                       | 8.93                 |
| Alcohol KC/d                                                 | 183.16             | 118.64              | 55.79              | 58.39               | 27.44                      | 28.79                      | 59.77                |
| Sugary beverages KC/d                                        | 94.78              | 323.88              | 284.76             | 847.81              | 921.54                     | 964.08                     | 283.57               |
| Potatoes KC/d available                                      | 42.29              | 126.40              | 142.55             | 25.79               | 32.01                      | 16.68                      | 67.56                |
| Corn KC/d available                                          | 27.58              | 23.85               | 33.54              | 242.41              | 50.86                      | 206.19                     | 11.76                |
| Fruits KC/d                                                  | 44.43              | 59.56               | 52.27              | 65.68               | 52.92                      | 39.61                      | 107.07               |
| Vegetables KC/d                                              | 149.32             | 101.07              | 46.17              | 60.72               | 27.81                      | 54.98                      | 31.79                |
| Nuts and seeds KC/d                                          | 9.26               | 16.94               | 1.02               | 6.27                | 1.92                       | 12.72                      | 0.68                 |
| Whole grains KC/d                                            | 76.05              | 16.16               | 58.94              | 142.06              | 83.46                      | 68.32                      | 43.78                |
| Legumes KC/d                                                 | 71.84              | 17.07               | 45.78              | 76.99               | 38.35                      | 73.84                      | 21.99                |
| Rice KC/d available                                          | 124.52             | 12.09               | 93.09              | 14.07               | 141.66                     | 13.46                      | 118.02               |
| Sweet potatoes KC/d available                                | 12.09              | 0.04                | 7.94               | 0.69                | 8.67                       | 1.71                       | 0.49                 |
| Total KC/d available                                         | 2590               | 3406                | 1948               | 3015                | 2288                       | 2330                       | 2273                 |
| Vit A deficiency children/100k/yr                            | 8151               | 1643                | 19372              | 23939               | 11463                      | 17947                      | 20185                |
| Sodium g/d                                                   | 6.01               | 3.21                | 3.14               | 2.62                | 2.97                       | 1.83                       | 3.16                 |
| Calcium g/d                                                  | 0.425              | 0.707               | 0.299              | 0.370               | 0.293                      | 0.220                      | 0.314                |
| Dietary fiber g/d                                            | 13.43              | 8.68                | 9.44               | 15.51               | 5.90                       | 12.54                      | 6.25                 |
| Physical activity METs                                       | 3460               | 2795                | 3774               | 3833                | 4935                       | 6142                       | 3740                 |
| Child underweight >2SD                                       | 0.045              | 0.012               | 0.069              | 0.050               | 0.042                      | 0.193                      | 0.096                |
| Stop breast feeding <6 months                                | 0.171              | 0.208               | 0.108              | 0.171               | 0.140                      | 0.087                      | 0.130                |
| Ambient pollution PM <sub>0.25</sub>                         | 13.10              | 13.87               | 28.99              | 24.28               | 13.24                      | 28.61                      | 17.86                |
| Smoking rate (0-1)                                           | 0.268              | 0.289               | 0.075              | 0.149               | 0.073                      | 0.077                      | 0.080                |
| Secondhand smoking (0-1)                                     | 0.353              | 0.320               | 0.238              | 0.344               | 0.178                      | 0.224                      | 0.206                |
| Sublingual tobacco rate (0-1)                                | 0.012              | 0.003               | 0.004              | 0.002               | 0.002                      | 0.001                      | 0.004                |
| Blood lead level mcg/dl                                      | 2.65               | 3.86                | 5.17               | 5.34                | 4.80                       | 5.89                       | 4.51                 |
| Household air pollution (0-1)                                | 0.002              | 0.010               | 0.454              | 0.213               | 0.193                      | 0.627                      | 0.080                |
| Kidney disease stage III (0-1)                               | 0.038              | 0.028               | 0.050              | 0.078               | 0.068                      | 0.075                      | 0.055                |
| Type 1 DM early deaths                                       | 1.25               | 2.91                | 4.84               | 12.64               | 7.71                       | 12.03                      | 6.92                 |
| Type 2 DM early deaths                                       | 2.03               | 3.70                | 11.37              | 60.97               | 18.07                      | 40.38                      | 27.44                |
| BMI kg/M <sup>2</sup>                                        | 21.89              | 23.47               | 23.29              | 24.82               | 22.98                      | 21.97                      | 25.04                |
| Fasting plasma glucose mmol/L                                | 4.77               | 4.46                | 4.01               | 4.53                | 4.31                       | 4.12                       | 4.26                 |
| Systolic BP mm Hg                                            | 137.56             | 135.11              | 125.19             | 130.31              | 133.66                     | 131.15                     | 126.85               |
| Socio-demographic index                                      | 0.828              | 0.822               | 0.590              | 0.608               | 0.644                      | 0.431                      | 0.575                |
| Likely mechanism of low CVD (see discussion for explanation) | FSVV, Plants       | FSVV                | Smoking, metabolic | FSVV, Plants        | Physical activity, smoking | Physical activity, smoking | FSVV, smoking        |

449 <sup>a</sup> Japan not only had high FSVV but also had relatively high intake of GBD risk factor plant  
450 foods (fruits, vegetables, nuts and seeds, whole grains, and legumes: 350.9 KC/d).

451 <sup>b</sup> France was characteristic of 23 other low CVD countries in that intake of milk products was  
452 high (France milk=95.75 KC/d and in the other 23 countries' milk>68 KC/d, Table 3 compared  
453 with worldwide mean milk=25.04 KC/d).

454 <sup>c</sup> The low CVD of Peru might be attributed to a relatively low smoking rate (7.5%) and good  
455 metabolic statistics (mean BMI=23.3 Kg/M<sup>2</sup>, mean FPG=4.01 mmol/L, mean LDLc=2.37  
456 mmol/L, mean SBP=125.2 mm/Hg).

457 <sup>d</sup> While Mexico had a lower FSVV than most low CVD countries (Mexico FSVV=413.3 KC/d),  
458 like Japan it had relatively high intake of important plant foods (fruits, vegetables, nuts and  
459 seeds, whole grains, and legumes: totaling 351.7 KC/d).

460 <sup>e</sup> Panama, with moderate FSVV=383.8 KC/d, had relatively high physical activity (Panama  
461 physical activity=4935 METs) and low smoking rate (male/female mean smoking=7.3%).

462 <sup>f</sup> While Guatemala had relatively low FSVV (FSVV=231.1 KC/d) and low GBD risk factor plant  
463 food intake (fruits, vegetables, nuts and seeds, whole grains, and legumes: 249.5 KC/d), it had  
464 relatively high physical activity (physical activity=6142 METs) and a low smoking rate  
465 (male/female mean smoking=7.7%).

466 <sup>g</sup> Ecuador had an intermediary FSVV (FSVV=375.4 KC/d) and relatively low intake of  
467 important plant foods (fruits, vegetables, nuts and seeds, whole grains, and legumes: totaling  
468 205.3 KC/d). However, Ecuador had a low rate of smoking (male/female mean smoking=8.0%).  
469 and a low SBP (mean SBP=126.9 mm/Hg).

470

471

472 **Table 5. CVD and risk factors for countries with FSVV  $\geq 567.27$  KC/d (n=974 cohorts)**

| CVD and CVD risk factors                   | Mean    | SD     | Min     | Max     | r      | 95% CI low | 95% CI high | P      |
|--------------------------------------------|---------|--------|---------|---------|--------|------------|-------------|--------|
| Cardiovascular deaths/100k/year ages 15-69 | 273.72  | 143.95 | 73.47   | 913.18  |        |            |             |        |
| LDL cholesterol mmol/L                     | 2.91    | 0.14   | 2.36    | 3.20    | -0.254 | -0.312     | -0.194      | <.0001 |
| Fat-soluble vitamin variable               | 692.58  | 111.88 | 527.67  | 932.18  | 0.523  | 0.476      | 0.567       | <.0001 |
| Processed meat KC/d                        | 25.01   | 15.30  | 2.16    | 68.77   | 0.459  | 0.408      | 0.507       | <.0001 |
| Red meat KC/d                              | 122.16  | 41.41  | 43.65   | 235.95  | 0.655  | 0.618      | 0.690       | <.0001 |
| Fish KC/d                                  | 49.08   | 89.24  | 7.60    | 370.36  | -0.259 | -0.317     | -0.199      | <.0001 |
| Milk KC/d                                  | 78.58   | 26.14  | 14.60   | 146.82  | 0.185  | 0.123      | 0.245       | <.0001 |
| Poultry KC/d available                     | 129.97  | 60.21  | 41.65   | 411.87  | 0.366  | 0.311      | 0.419       | <.0001 |
| Eggs KC/d available                        | 40.80   | 7.25   | 14.59   | 69.64   | -0.242 | -0.301     | -0.182      | <.0001 |
| Saturated fatty acids KC/d                 | 299.88  | 66.83  | 129.39  | 481.07  | 0.193  | 0.132      | 0.253       | <.0001 |
| PUFAs KC/d                                 | 211.86  | 83.06  | 80.53   | 381.31  | 0.382  | 0.327      | 0.435       | <.0001 |
| Trans fatty acids KC/d                     | 25.17   | 17.82  | 4.23    | 66.89   | 0.224  | 0.163      | 0.283       | <.0001 |
| Alcohol KC/d                               | 155.02  | 65.23  | 11.92   | 429.81  | 0.475  | 0.425      | 0.522       | <.0001 |
| Sugary beverages KC/d                      | 231.66  | 121.92 | 72.91   | 769.89  | 0.332  | 0.274      | 0.386       | <.0001 |
| Potatoes KC/d available                    | 106.39  | 40.47  | 9.50    | 224.86  | 0.109  | 0.046      | 0.170       | 0.00   |
| Corn KC/d available                        | 19.45   | 9.41   | 1.79    | 47.39   | 0.086  | 0.024      | 0.148       | 0.01   |
| Fruits KC/d                                | 66.91   | 15.93  | 34.83   | 161.39  | -0.014 | -0.077     | 0.049       | 0.66   |
| Vegetables KC/d                            | 117.42  | 34.24  | 42.27   | 304.17  | -0.127 | -0.188     | -0.064      | <.0001 |
| Nuts and seeds KC/d                        | 21.98   | 8.91   | 0.85    | 102.99  | 0.177  | 0.115      | 0.237       | <.0001 |
| Whole grains KC/d                          | 52.11   | 20.93  | 1.61    | 92.45   | 0.121  | 0.059      | 0.183       | 0.00   |
| Legumes KC/d                               | 40.76   | 25.29  | 2.95    | 133.26  | 0.040  | -0.023     | 0.102       | 0.21   |
| Rice KC/d available                        | 38.82   | 46.75  | 6.50    | 179.63  | -0.138 | -0.199     | -0.076      | <.0001 |
| Sweet potatoes KC/d available              | 3.63    | 3.99   | 0.04    | 17.63   | -0.128 | -0.189     | -0.066      | <.0001 |
| Total KC/d available                       | 3219    | 292    | 2516    | 3898    | 0.249  | 0.189      | 0.307       | <.0001 |
| Vit A deficiency children/100k/yr          | 9316    | 6877   | 1400    | 28081   | -0.105 | -0.166     | -0.042      | 0.00   |
| Sodium g/d                                 | 3.98    | 0.96   | 2.22    | 6.70    | -0.040 | -0.102     | 0.023       | 0.21   |
| Calcium g/d                                | 0.645   | 0.129  | 0.353   | 1.044   | 0.396  | 0.342      | 0.448       | <.0001 |
| Dietary fiber g/d                          | 10.62   | 1.75   | 6.30    | 18.15   | 0.241  | 0.181      | 0.299       | <.0001 |
| Physical activity METs                     | 3523    | 765    | 1781    | 5494    | 0.578  | 0.535      | 0.618       | <.0001 |
| Child underweight >2SD                     | 0.015   | 0.013  | 0.004   | 0.058   | -0.197 | -0.257     | -0.136      | <.0001 |
| Stop breast feeding <6 months              | 0.196   | 0.017  | 0.129   | 0.219   | 0.268  | 0.208      | 0.325       | <.0001 |
| Ambient pollution PM <sub>0.25</sub>       | 12.67   | 7.13   | 4.38    | 87.22   | 0.005  | -0.058     | 0.068       | 0.87   |
| Smoking rate (0-1)                         | 0.233   | 0.084  | 0.021   | 0.444   | 0.233  | 0.172      | 0.291       | <.0001 |
| Secondhand smoking (0-1)                   | 0.309   | 0.070  | 0.201   | 0.586   | -0.306 | -0.362     | -0.248      | <.0001 |
| Sublingual tobacco rate (0-1)              | 0.013   | 0.020  | 0.001   | 0.125   | 0.579  | 0.536      | 0.620       | <.0001 |
| Blood lead level mcg/dl                    | 3.93    | 0.77   | 1.22    | 5.72    | 0.451  | 0.400      | 0.500       | <.0001 |
| Household air pollution (0-1)              | 0.012   | 0.026  | 0.000   | 0.201   | -0.011 | -0.073     | 0.052       | 0.74   |
| Kidney disease stage III (0-1)             | 0.036   | 0.012  | 0.016   | 0.109   | -0.028 | -0.090     | 0.035       | 0.39   |
| Type 1 DM early deaths                     | 3.93    | 2.67   | 0.55    | 15.97   | 0.573  | 0.529      | 0.613       | <.0001 |
| Type 2 DM early deaths                     | 9.54    | 7.52   | 0.75    | 54.22   | 0.622  | 0.582      | 0.659       | <.0001 |
| BMI kg/M <sup>2</sup>                      | 24.87   | 1.78   | 21.40   | 29.39   | 0.484  | 0.434      | 0.530       | <.0001 |
| Fasting plasma glucose mmol/L              | 4.73    | 0.23   | 3.84    | 5.58    | 0.091  | 0.028      | 0.153       | 0.00   |
| Systolic BP mm Hg                          | 133.639 | 4.362  | 126.863 | 142.147 | -0.148 | -0.209     | -0.086      | <.0001 |
| Socio-demographic index (0-1)              | 0.838   | 0.053  | 0.592   | 0.896   | -0.052 | -0.114     | 0.011       | 0.11   |
| Sex male 1 and female 2                    | 1.50    | 0.50   | 1.00    | 2.00    | -0.745 | -0.772     | -0.716      | <.0001 |

473

474

475 **Figure 1. CVD versus LDLc scatter plot**

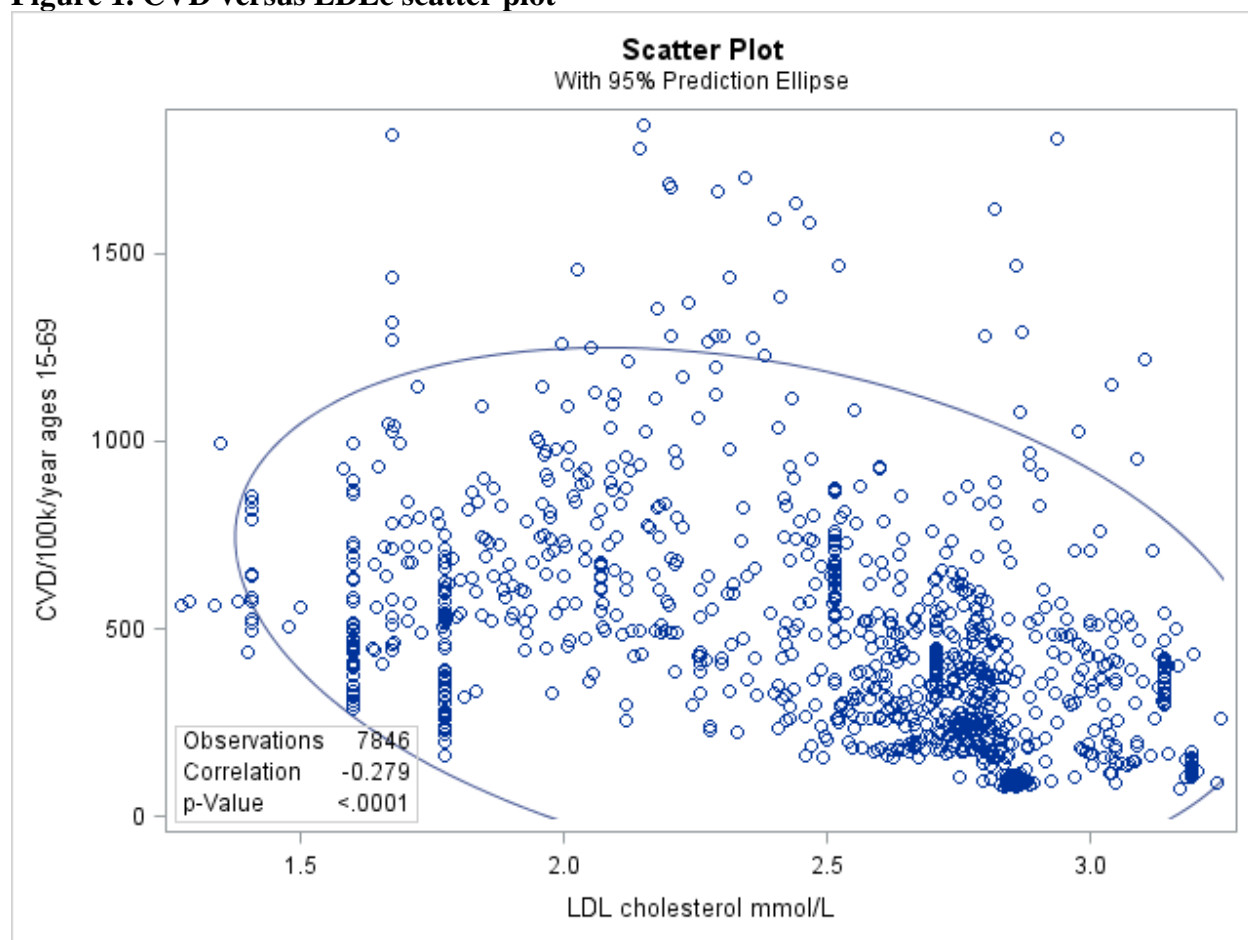

476  
477  
478

479 **Supplementary Table 1. Definitions of GBD risk factors and covariates related to CVD**

| <b>Variables</b>                                | <b>Definition</b>                                                                                                                                                                                                                                                                                                                 |
|-------------------------------------------------|-----------------------------------------------------------------------------------------------------------------------------------------------------------------------------------------------------------------------------------------------------------------------------------------------------------------------------------|
| <b>Alcohol</b>                                  | Any alcohol consumption (g/day)                                                                                                                                                                                                                                                                                                   |
| <b>Ambient particulate matter pollution</b>     | Annual average daily exposure to outdoor air concentrations of particulate matter with an aerodynamic diameter of $\leq 2.5 \mu\text{g}/\text{m}^3$ (PM <sub>2.5</sub> )                                                                                                                                                          |
| <b>Body-mass index</b>                          | Body mass index (BMI) ( $\text{kg}/\text{m}^2$ )—the dependent variable of interest                                                                                                                                                                                                                                               |
| <b>Chewing tobacco</b>                          | Current use of any chewing tobacco product                                                                                                                                                                                                                                                                                        |
| <b>Child underweight</b>                        | Proportion of children – 3 SD to – 2 SD of the WHO 2006 standard weight-for-age curve (0-1)                                                                                                                                                                                                                                       |
| <b>Corn</b>                                     | Corn availability per capita (g/day), a covariate                                                                                                                                                                                                                                                                                 |
| <b>Discontinued breast feeding</b>              | Proportion of children aged 6-23 months who do not receive any breast milk                                                                                                                                                                                                                                                        |
| <b>Eggs</b>                                     | Eggs availability per capita (g/day) a covariate                                                                                                                                                                                                                                                                                  |
| <b>Fasting plasma glucose</b>                   | Fasting plasma glucose (mmol/L)                                                                                                                                                                                                                                                                                                   |
| <b>Fish</b>                                     | This variable expressed in g/day was derived by determining the weight of fish in g corresponding to 1 g of omega-3 fatty acids (eicosapentaenoic acid and docosahexaenoic acid) by averaging the fish g per 1 g of omega-3 fatty acids 20 species of fish= 117.04 g/day fish/1 g/day omega-3 fatty acids (Supplementary Table 3) |
| <b>Fruits</b>                                   | Consumption of fruits (includes fresh, frozen, cooked, canned, or dried fruit but excludes fruit juices and salted or pickled fruits) (g/day)                                                                                                                                                                                     |
| <b>Household air pollution from solid fuels</b> | Individual exposure to PM <sub>2.5</sub> due to use of solid cooking fuel                                                                                                                                                                                                                                                         |
| <b>Kidney function impaired</b>                 | Proportion of the population with ACR >30 mg/g or GFR <60 mL/min/1.73 m <sup>2</sup> , excluding end-stage renal disease                                                                                                                                                                                                          |
| <b>Kilocalories available /day</b>              | The mean number of kilocalories per capita available per day to people in each location (kcal/day available), a covariate                                                                                                                                                                                                         |
| <b>LDL cholesterol</b>                          | Serum low-density lipoprotein cholesterol (mmol/L)                                                                                                                                                                                                                                                                                |
| <b>Lead exposure</b>                            | Blood lead levels in $\mu\text{g}/\text{dL}$ of blood, bone lead levels in $\mu\text{g}/\text{g}$ of bone                                                                                                                                                                                                                         |
| <b>Legumes</b>                                  | Consumption of beans, lentils, pulses (g/day)                                                                                                                                                                                                                                                                                     |
| <b>Milk</b>                                     | Consumption of milk including non-fat, low-fat, and full-fat milk but excluding soy milk and other plant derivatives (g/day)                                                                                                                                                                                                      |
| <b>Nuts and seeds</b>                           | Consumption of nuts and seeds (g/day)                                                                                                                                                                                                                                                                                             |
| <b>Physical activity</b>                        | Average weekly physical activity at work, home, transport-related and recreational measured by MET min per week. Less than 3000 METs per week constitutes low physical activity.                                                                                                                                                  |
| <b>Poultry</b>                                  | Poultry availability per capita (g/day), a covariate                                                                                                                                                                                                                                                                              |
| <b>Potatoes</b>                                 | Potatoes availability per capita (g/day), a covariate                                                                                                                                                                                                                                                                             |
| <b>Processed meat</b>                           | Consumption of any processed meat (includes meat preserved by smoking, curing, salting, or addition of chemical preservatives, including bacon, salami, sausages, or deli or luncheon meats like ham, turkey, and pastrami) (g/day)                                                                                               |
| <b>Red meat</b>                                 | Consumption of red meat (includes beef, pork, lamb, and goat but excludes poultry, fish, eggs, and all processed meats) (g/day)                                                                                                                                                                                                   |
| <b>Rice</b>                                     | Rice availability per capita (g/day), a covariate                                                                                                                                                                                                                                                                                 |
| <b>Seafood omega-3 fatty acids</b>              | Seafood omega-3 fatty acids (eicosapentaenoic acid and docosahexaenoic acid) in tablet or fish form (g/day)                                                                                                                                                                                                                       |
| <b>Second-hand smoke</b>                        | Average daily exposure to air particulate matter from second-hand smoke with an aerodynamic diameter smaller than $2.5 \mu\text{g}$ , measured in $\mu\text{g}/\text{m}^3$ , among non-smokers                                                                                                                                    |
| <b>Smoking</b>                                  | Prevalence of current use of any smoked tobacco product and prevalence of former use of any smoked tobacco product; among current smokers, cigarette equivalents smoked per smoker per day and cumulative pack-years of exposure; among former smokers, number of years since quitting                                            |
| <b>Socio-demographic index</b>                  | SDI is a composite indicator of development status that was originally constructed for GBD 2015 and is derived from components that correlate strongly with health outcomes.                                                                                                                                                      |

|                                  |                                                                                                                                                                                                                                                                                                        |
|----------------------------------|--------------------------------------------------------------------------------------------------------------------------------------------------------------------------------------------------------------------------------------------------------------------------------------------------------|
|                                  | It is the geometric mean for indices of the total fertility rate among women younger than 25 years, mean education for those aged 15 years or older, and lag-distributed income per capita. The resulting metric ranges from 0 to 1, with higher values corresponding to higher levels of development. |
| <b>Sugar-sweetened beverages</b> | Consumption of any beverage with $\geq 50$ calories of sugar per one-cup serving, including carbonated beverages, sodas, energy drinks, fruit drinks but excluding 100% fruit and vegetable juices (g/day)                                                                                             |
| <b>Sweet potatoes</b>            | Sweet potato availability per capita (g/day), a covariate                                                                                                                                                                                                                                              |
| <b>Systolic blood pressure</b>   | Systolic blood pressure (mm Hg)                                                                                                                                                                                                                                                                        |
| <b>Total sugar</b>               | Total sugar availability per capita (g/day), a covariate                                                                                                                                                                                                                                               |
| <b>Vegetables</b>                | Consumption of frozen, cooked, canned, or dried vegetables (including legumes but excluding salted or pickled, juices, nuts and seeds, and starchy vegetables such as potatoes or corn) (g/day)                                                                                                        |
| <b>Vitamin A deficiency</b>      | Proportion of children aged 0–5 years with serum retinol concentration $< 0.7 \mu\text{mol/L}$                                                                                                                                                                                                         |
| <b>Whole grains</b>              | Consumption of whole grains (bran, germ, and endosperm in their natural proportions) from breakfast cereals, bread, rice, pasta, biscuits, muffins, tortillas, pancakes, and others (g/day)                                                                                                            |

480

481

482 **Supplementary Table 2. Omega-3 Fatty Acid g to fish g calculation¶**

| Fish                                                | DHA g/3-ounce fish | EPA g/3-ounce fish | Omega-3 Fatty Acids (DHA + EPA) g/3-ounce fish mean | Fish 3 ounces = 85.02 g | Fish (g) per omega-3 Fatty Acids (g)=85.02 / 0.7264 |
|-----------------------------------------------------|--------------------|--------------------|-----------------------------------------------------|-------------------------|-----------------------------------------------------|
| Salmon Atlantic farmed                              | 1.24               | 0.59               |                                                     |                         |                                                     |
| Salmon Atlantic wild                                | 1.22               | 0.35               |                                                     |                         |                                                     |
| Herring Atlantic                                    | 0.94               | 0.77               |                                                     |                         |                                                     |
| Sardines canned in tomato sauce drained             | 0.74               | 0.45               |                                                     |                         |                                                     |
| Mackerel Atlantic                                   | 0.59               | 0.43               |                                                     |                         |                                                     |
| Salmon pink canned drained                          | 0.63               | 0.28               |                                                     |                         |                                                     |
| Trout rainbow wild                                  | 0.44               | 0.40               |                                                     |                         |                                                     |
| Oysters eastern wild                                | 0.23               | 0.30               |                                                     |                         |                                                     |
| Sea bass                                            | 0.47               | 0.18               |                                                     |                         |                                                     |
| Shrimp                                              | 0.12               | 0.12               |                                                     |                         |                                                     |
| Lobster                                             | 0.07               | 0.10               |                                                     |                         |                                                     |
| Tuna light canned in water drained                  | 0.17               | 0.02               |                                                     |                         |                                                     |
| Tilapia                                             | 0.11               |                    |                                                     |                         |                                                     |
| Scallops                                            | 0.09               | 0.06               |                                                     |                         |                                                     |
| Cod Pacific                                         | 0.1                | 0.04               |                                                     |                         |                                                     |
| Tuna yellowfin                                      | 0.09               | 0.01               |                                                     |                         |                                                     |
| Mean DHA and EPA Omega-3 Fatty Acids g/3 ounce fish | 0.4531             | 0.2733             |                                                     |                         |                                                     |
| Calculations total Omega-3 FA g to fish g           |                    |                    | 0.7264                                              | 85.02                   | 117.043                                             |

483 ¶ Data on omega-3 fatty acid content of varieties of fish came from the National Institutes of  
 484 Health Office of Dietary Supplements (USA)

485  
 486



487 **Supplementary Table 3. Calculations of KC/d from g/day of animal and plant foods¶**

| <b>Foods</b>                     | <b>Food sub-categories</b> | <b>kcal/serving</b> | <b>g/serving</b> | <b>kcal/g</b> |
|----------------------------------|----------------------------|---------------------|------------------|---------------|
| <b>Milk (2% fat)</b>             |                            | 122                 | 244              | 0.5           |
| <b>Fish</b>                      |                            | 218                 | 170              | 1.28          |
| <b>Eggs</b>                      |                            | 72                  | 50               | 1.44          |
| <b>Poultry</b>                   |                            | 187                 | 85               | 2.91          |
| <b>Red meat</b>                  |                            | 247                 | 85               | 2.91          |
| <b>Processed meat</b>            |                            |                     |                  |               |
|                                  | <b>Salami</b>              | 222                 | 59               | 3.76          |
|                                  | <b>Pastrami</b>            | 104                 | 71               | 1.46          |
|                                  | <b>Ring baloney</b>        | 86                  | 28               | 3.07          |
|                                  | <b>Pepperoni</b>           | 94                  | 100              | 0.94          |
| <b>Average processed meat</b>    |                            | 126.5               | 64.5             | 1.96          |
| <b>Fruits</b>                    |                            | 97                  | 162              | 0.60          |
| <b>Vegetables</b>                |                            | 59                  | 91               | 0.65          |
| <b>Legumes</b>                   |                            | 249                 | 179              | 1.39          |
| <b>Nuts</b>                      |                            | 172                 | 28               | 6.14          |
| <b>Seeds</b>                     |                            |                     |                  |               |
|                                  | <b>Flax seeds</b>          | 55                  | 10               | 5.5           |
|                                  | <b>Chia seeds</b>          | 58                  | 12               | 4.83          |
|                                  | <b>Fennel seeds</b>        | 34.5                | 10               | 3.45          |
|                                  | <b>Hemp seeds</b>          | 55.3                | 10               | 5.53          |
| <b>Average of seeds</b>          |                            | 50.7                | 10.5             | 4.83          |
| <b>Average of nuts and seeds</b> |                            | 111.4               | 19.25            | 5.78          |
| <b>Corn</b>                      |                            | 99                  | 103              | 0.96          |
| <b>Potatoes</b>                  |                            | 161                 | 173              | 0.93          |
| <b>Sweet potatoes</b>            |                            | 115                 | 151              | 0.76          |
| <b>Rice</b>                      |                            | 205                 | 158              | 1.3           |
| <b>Whole grains</b>              |                            | 120                 | 52               | 2.31          |

488 ¶ Source: NutritionIX app[20]

489

490• **Contributors**

491• DKC acts as guarantor; conceived and designed the study, acquired and analysed the GBD data  
492 form IHME, interpreted the study findings, drafted the manuscript, critically reviewed and edited  
493 the manuscript and tables, and approved the final version for publication.

494

495 CW designed software programs in R to format and population weighted the data,  
496 aided with the SAS statistical analysis, critically reviewed the manuscript, and  
497 approved the final version for publication.

498

499 The lead author (DKC) affirms the manuscript is an honest, accurate, and transparent account of  
500 the study being reported; that no important aspects of the study have been omitted; and that any  
501 discrepancies from the study as planned (and, if relevant, registered) have been explained.

502

503 **Author access to data:** As volunteer collaborators with the Institute of Health Metrics and  
504 Evaluation, we received about 1.4 gigabytes of raw data on noncommunicable disease deaths and  
505 43 relevant risk factors.

506

507• **Data sharing**

508 **Data sharing statement:** The formatted database on which this analysis is based is posted on the  
509 Mendeley data repository (<https://data.mendeley.com/>):

510 Cundiff, David and Wu, Chunyi (2021), “IHME GBD CVD risk factors”, Mendeley Data, V2,  
511 doi: 10.17632/g6b39zxck4.1 <http://dx.doi.org/10.17632/g6b39zxck4.1>

512

## 513 **Declaration of interests**

514 The authors declare no competing interests.

515•

516• **Competing interests' statement:** Both authors have completed the ICMJE uniform disclosure  
517 form at [www.icmje.org/coi\\_disclosure.pdf](http://www.icmje.org/coi_disclosure.pdf) and declare: no support from any organisation for the  
518 submitted work; no financial relationships with any organisations that might have an interest in  
519 the submitted work in the previous three years; no other relationships or activities that could  
520 appear to have influenced the submitted work.

521

## 522 **Acknowledgments**

523 We thank Scott Glenn and Brent Bell from IHME who supplied us with the GBD risk factor  
524 exposure data.

525

526• **Funding:** This research received no grant from any funding agency in the public, commercial or  
527 not-for-profit sectors. The Bill and Melinda Gates Foundation funded the acquisition of the data  
528 for this analysis by the IHME. The data were provided to the authors as volunteer collaborators  
529 with IHME.

530

531 **Ethical approval:** Studies based solely on data from IHME GBD database do not need approval  
532 from any bioethics committee or other agency.

533

534

535 This report followed the STrengthening the Reporting of OBservational studies in Epidemiology  
536 (STROBE) guidelines for reporting global health estimates.[46]

537

538

## 539 References

- 540 1. Zile MH. Vitamin A-not for your eyes only: requirement for heart formation begins early in  
541 embryogenesis. *Nutrients* 2010;2(5):532-50.
- 542 2. Xing X, Tao F. [Advance of study on vitamin A deficiency and excess associated with  
543 congenital heart disease]. *Wei Sheng Yan Jiu* 2008;37(6):754-6.
- 544 3. Saremi A, Arora R. Vitamin E and cardiovascular disease. *Am J Ther* 2010;17(3):e56-65.
- 545 4. Beulens JWJ, Booth SL, van den Heuvel EGHM, et al. The role of menaquinones (vitamin  
546 K2) in human health. *British Journal of Nutrition* 2013;110:1357-68.  
547 [https://www.cambridge.org/core/journals/british-journal-of-nutrition/article/the-role-of-](https://www.cambridge.org/core/journals/british-journal-of-nutrition/article/the-role-of-menaquinones-vitamin-k2-in-human-health/5B9F317B526629D8BA77B6435F1E5509)  
548 [menaquinones-vitamin-k2-in-human-health/5B9F317B526629D8BA77B6435F1E5509](https://www.cambridge.org/core/journals/british-journal-of-nutrition/article/the-role-of-menaquinones-vitamin-k2-in-human-health/5B9F317B526629D8BA77B6435F1E5509)
- 549 5. Wang L, Song Y, Manson JE, et al. Circulating 25-Hydroxy-Vitamin D and Risk of  
550 Cardiovascular Disease: A Meta-Analysis of Prospective Studies. *Circulation:*  
551 *Cardiovascular Quality and Outcomes* 2012;5(6):819-29.  
552 <http://circoutcomes.ahajournals.org/content/5/6/819.abstract>
- 553 6. Fu X, Harshman SG, Shen X, et al. Multiple Vitamin K Forms Exist in Dairy Foods. *Curr Dev*  
554 *Nutr* 2017;1(6):e000638-e38. <https://www.ncbi.nlm.nih.gov/pmc/articles/PMC5998353/>
- 555 7. Walther B, Chollet M. Vitamin K2 - Vital for Health and Wellbeing. In: Gordeladze JO, ed.  
556 Menaquinones, Bacteria, and Foods: Vitamin K2 in the Die: IntechOpen, 2017.
- 557 8. Kamao M, Suhara Y, Tsugawa N, et al. Vitamin K content of foods and dietary vitamin K  
558 intake in Japanese young women. *J Nutr Sci Vitaminol (Tokyo)* 2007;53(6):464-70.  
559 <https://pubmed.ncbi.nlm.nih.gov/18202532/>
- 560 9. Kaneki M HS, Hosoi T, Fujiwara S, Lyons A, Crean SJ, Ishida N, Nakagawa M, Takechi M,  
561 Sano Y, Mizuno Y, Hoshino S, Miyao M, Inoue S, Horiki K, Shiraki M, Ouchi Y, Orimo  
562 H. Japanese fermented soybean food as the major determinant of the large geographic  
563 difference in circulating levels of vitamin K2: possible implications for hip-fracture risk.  
564 *Nutrition* 2001;17(4):315-21. <https://pubmed.ncbi.nlm.nih.gov/11369171/>
- 565 10. Tamang JP, Cotter PD, Endo A, et al. Fermented foods in a global age: East meets West.  
566 *Comprehensive Reviews in Food Science and Food Safety* 2020;19(1):184-217.  
567 <https://onlinelibrary.wiley.com/doi/full/10.1111/1541-4337.12520>
- 568 11. Joseph M. Fermented Soy Products: A Guide To 12 Traditional Foods. *Nutrition Advance*  
569 2020
- 570 12. Global Burden of Disease Study 2017 (GBD 2017) Data Input Sources Tool. Seattle,  
571 WashingtonInstitute of Health Metrics and Evaluation 2019  
572 <http://ghdx.healthdata.org/gbd-2017/data-input-sources>
- 573 13. PROTOCOL FOR THE GLOBAL BURDEN OF DISEASES, INJURIES, AND RISK  
574 FACTORS STUDY (GBD) Version 3.0; Issue 26. Seattle, WashingtonInstitute for  
575 Health Metrics and Evaluation February 2018  
576 [http://www.healthdata.org/sites/default/files/files/Projects/GBD/GBD\\_Protocol.pdf](http://www.healthdata.org/sites/default/files/files/Projects/GBD/GBD_Protocol.pdf)
- 577 14. Naghavi M, Abajobir AA, Abbafati C, et al. Global, regional, and national age-sex specific  
578 mortality for 264 causes of death, 1980-2016: a systematic analysis for the Global  
579 Burden of Disease Study 2016. *The Lancet* 2017;390 (10100):1151-210.  
580 [https://doi.org/10.1016/S0140-6736\(17\)32152-9](https://doi.org/10.1016/S0140-6736(17)32152-9)
- 581 15. Flaxman AD, Lee YY, Vos T, et al. An Integrative Metaregression Framework for  
582 Descriptive Epidemiology. Seattle, WA: University of Washington Press, 2015.

- 583 16. GBD 2017 Risk Factor Collaborators. Global, regional, and national comparative risk  
584 assessment of 84 behavioural, environmental and occupational, and metabolic risks or  
585 clusters of risks for 195 countries and territories, 1990–2017: a systematic analysis for the  
586 Global Burden of Disease Study 2017. . *The Lancet* 2018;392(10159):1923-94.  
587 [https://doi.org/10.1016/S0140-6736\(18\)32225-6](https://doi.org/10.1016/S0140-6736(18)32225-6)
- 588 17. GBD 2017 Risk Factor Collaborators. Global, regional, and national comparative risk  
589 assessment of 84 behavioural, environmental and occupational, and metabolic risks or  
590 clusters of risks for 195 countries and territories, 1990–2017: a systematic analysis for the  
591 Global Burden of Disease Study 2017: Table of risk factor definitions. *The Lancet*  
592 2018;392(10159):1923-94.  
593 [https://www.thelancet.com/action/showFullTableHTML?isHtml=true&tableId=tbl1&pii=](https://www.thelancet.com/action/showFullTableHTML?isHtml=true&tableId=tbl1&pii=S0140-6736%2818%2932225-6)  
594 [S0140-6736%2818%2932225-6](https://www.thelancet.com/action/showFullTableHTML?isHtml=true&tableId=tbl1&pii=S0140-6736%2818%2932225-6)
- 595 18. Call for Collaborators. . Seattle, Washington Institute for Health Metrics and Evaluation at  
596 the University of Washington 2019 2019 [http://www.healthdata.org/gbd/call-for-](http://www.healthdata.org/gbd/call-for-collaborators)  
597 [collaborators](http://www.healthdata.org/gbd/call-for-collaborators)
- 598 19. Omega 3 Fatty Acids: Fact Sheet for Health Professionals. National Institutes of Health US  
599 Department of Health and Human Services, 2018 The Office of Dietary Supplements.  
600 <https://ods.od.nih.gov/factsheets/Omega3FattyAcids-HealthProfessional/> Accessed  
601 September 1, 2018
- 602 20. Nutritionix Track App. Syndigo LLC 2019 <https://www.nutritionix.com/>
- 603 21. Ritchie H, Roser M. Diet Compositions. *Our World in Data* 2017.  
604 <https://ourworldindata.org/diet-compositions>
- 605 22. Pu J, Romanelli R, Zhao B, et al. Dyslipidemia in special ethnic populations. *Cardiol Clin*  
606 2015;33(2):325-33. <https://www.ncbi.nlm.nih.gov/pmc/articles/PMC4421090/>
- 607 23. Frank ATH, Zhao B, Jose PO, et al. Racial/ethnic differences in dyslipidemia patterns.  
608 *Circulation* 2014;129(5):570-79: [11/05].  
609 <https://www.ncbi.nlm.nih.gov/pmc/articles/PMC4212818/>
- 610 24. Keys A, Menotti A, Karvonen MJ, et al. The diet and 15-year death rate in the seven  
611 countries study. *Am J Epidemiol* 1986;124(6):903-15.  
612 <https://academic.oup.com/aje/article-abstract/124/6/903/174332?redirectedFrom=fulltext>
- 613 25. Mahmood SS, Levy D, Vasan RS, et al. The Framingham Heart Study and the epidemiology  
614 of cardiovascular disease: a historical perspective. *Lancet (London, England)*  
615 2014;383(9921):999-1008: [09/29].  
616 <https://www.ncbi.nlm.nih.gov/pmc/articles/PMC4159698/>
- 617 26. Dehghan M, Mente A, Zhang X, et al. Associations of fats and carbohydrate intake with  
618 cardiovascular disease and mortality in 18 countries from five continents (PURE): a  
619 prospective cohort study. *The Lancet* 2017;390(10107):2050-62.  
620 [https://doi.org/10.1016/S0140-6736\(17\)32252-3](https://doi.org/10.1016/S0140-6736(17)32252-3)
- 621 27. Countries Who Eat The Most Cheese. World Atlas 2021 2021  
622 [https://www.worldatlas.com/articles/countries-who-consume-the-most-](https://www.worldatlas.com/articles/countries-who-consume-the-most-cheese.html#:~:text=The%20top%20cheese%20consumer%20is,kilograms%20of%20cheese%20per%20capita.)  
623 [cheese.html#:~:text=The%20top%20cheese%20consumer%20is,kilograms%20of%20cheese%20per%20capita.](https://www.worldatlas.com/articles/countries-who-consume-the-most-cheese.html#:~:text=The%20top%20cheese%20consumer%20is,kilograms%20of%20cheese%20per%20capita.)
- 624
- 625 28. Cheese Consumption Per Capita in New Zealand. Czech RepublicHelgi Library, Source:  
626 Faostat Oct. 18, 2018 [https://www.helgilibrary.com/indicators/cheese-consumption-per-](https://www.helgilibrary.com/indicators/cheese-consumption-per-capita/new-zealand/)  
627 [capita/new-zealand/](https://www.helgilibrary.com/indicators/cheese-consumption-per-capita/new-zealand/)

- 628 29. Khalil Z, Alam B, Akbari AR, et al. The Medical Benefits of Vitamin K(2) on Calcium-  
629 Related Disorders. *Nutrients* 2021;13(2):691.  
630 <https://www.ncbi.nlm.nih.gov/pmc/articles/PMC7926526/>
- 631 30. POTATO PROCESSING AND USES. Lima, PeruInternational Potato Center 2020  
632 <https://cipotato.org/potato/potato-processing-uses/>
- 633 31. Juul F, Vaidean G, Lin Y, et al. Ultra-Processed Foods and Incident Cardiovascular Disease  
634 in the Framingham Offspring Study. *Journal of the American College of Cardiology*  
635 2021;77(12):1520-31. <https://doi.org/10.1016/j.jacc.2021.01.047>
- 636 32. Srour B, Fezeu LK, Kesse-Guyot E, et al. Ultra-processed food intake and risk of  
637 cardiovascular disease: prospective cohort study (NutriNet-Santé). *BMJ* 2019;365:11451.  
638 <https://www.bmj.com/content/bmj/365/bmj.11451.full.pdf>
- 639 33. Monteiro CA, Moubarac JC, Cannon G, et al. Ultra-processed products are becoming  
640 dominant in the global food system. *Obes Rev* 2013;14 Suppl 2:21-8.
- 641 34. Mozaffarian D, Fahimi S, Singh GM, et al. Global Sodium Consumption and Death from  
642 Cardiovascular Causes. *New England Journal of Medicine* 2014;371(7):624-34.  
643 <https://www.nejm.org/doi/full/10.1056/NEJMoa1304127>
- 644 35. O'Donnell M, Mente A, Yusuf S. Sodium Intake and Cardiovascular Health. *Circ Res*  
645 2015;116(6):1046-57.  
646 <https://www.ahajournals.org/doi/abs/10.1161/CIRCRESAHA.116.303771>
- 647 36. Roseboom T, van der Meulen JHP, Osmond C, et al. Coronary heart disease after prenatal  
648 exposure to the Dutch famine, 1944-45. *Heart* 2000;84(6):595-98.  
649 <https://www.heart.bmj.com/content/84/6/595>
- 650 37. Dieterich CM, Felice JP, O'Sullivan E, et al. Breastfeeding and health outcomes for the  
651 mother-infant dyad. *Pediatric clinics of North America* 2013;60(1):31-48: [11/03].  
652 <https://www.ncbi.nlm.nih.gov/pmc/articles/PMC3508512/>
- 653 38. Ambient (outdoor) air pollution. Geneva, SwitzerlandWorld Health Organization 2018  
654 [https://www.who.int/news-room/fact-sheets/detail/ambient-\(outdoor\)-air-quality-and-](https://www.who.int/news-room/fact-sheets/detail/ambient-(outdoor)-air-quality-and-health)  
655 [health](https://www.who.int/news-room/fact-sheets/detail/ambient-(outdoor)-air-quality-and-health)
- 656 39. Tobacco responsible for 20% of deaths from coronary heart disease Geneva,  
657 SwitzerlandWorld Health Organization 2020 [https://www.who.int/news/item/22-09-](https://www.who.int/news/item/22-09-2020-tobacco-responsible-for-20-of-deaths-from-coronary-heart-disease)  
658 [2020-tobacco-responsible-for-20-of-deaths-from-coronary-heart-disease](https://www.who.int/news/item/22-09-2020-tobacco-responsible-for-20-of-deaths-from-coronary-heart-disease)
- 659 40. Vaziri ND. Mechanisms of lead-induced hypertension and cardiovascular disease. *American*  
660 *Journal of Physiology-Heart and Circulatory Physiology* 2008;295(2):H454-H65.  
661 <https://journals.physiology.org/doi/abs/10.1152/ajpheart.00158.2008>
- 662 41. Lanphear BP, Rauch S, Auinger P, et al. Low-level lead exposure and mortality in US adults:  
663 a population-based cohort study. *The Lancet Public Health* 2018;3(4):e177-e84.  
664 [https://doi.org/10.1016/S2468-2667\(18\)30025-2](https://doi.org/10.1016/S2468-2667(18)30025-2)
- 665 42. Bikbov B, Purcell CA, Levey AS, et al. Global, regional, and national burden of chronic  
666 kidney disease, 1990-2017: a systematic analysis for the Global Burden of Disease Study  
667 2017. *The Lancet* 2020;395(10225):709-33. [https://doi.org/10.1016/S0140-](https://doi.org/10.1016/S0140-6736(20)30045-3)  
668 [6736\(20\)30045-3](https://doi.org/10.1016/S0140-6736(20)30045-3)
- 669 43. Ioannidis JA. The challenge of reforming nutritional epidemiologic research. *JAMA*  
670 2018;320(10):969-70. <http://dx.doi.org/10.1001/jama.2018.11025>
- 671 44. Global, regional, and national age-sex-specific mortality for 282 causes of death in 195  
672 countries and territories, 1980-2017: a systematic analysis for the Global Burden of

- 673 Disease Study 2017. *Lancet* 2018;392(10159):1736-88.  
674 [https://www.thelancet.com/journals/lancet/article/PIIS0140-6736\(18\)32203-7/fulltext](https://www.thelancet.com/journals/lancet/article/PIIS0140-6736(18)32203-7/fulltext)  
675 45. Afshin A, Sur PJ, Fay KA, et al. Health effects of dietary risks in 195 countries, 1990-2017: a  
676 systematic analysis for the Global Burden of Disease Study 2017. *The Lancet*  
677 2019;393(10184):1958-72. [https://doi.org/10.1016/S0140-6736\(19\)30041-8](https://doi.org/10.1016/S0140-6736(19)30041-8)  
678 46. Stevens GA, Alkema L, Black PRE, et al. Guidelines for Accurate and Transparent Health  
679 Estimates Reporting: the GATHER statement. *The Lancet* 2016;388(10062):e19-e23.  
680 [https://doi.org/10.1016/S0140-6736\(16\)30388-9](https://doi.org/10.1016/S0140-6736(16)30388-9)  
681
